# Supplementary material
Source: publisher site journal article supplement (https://www.dovepress.com/article/576669)
Supplement: Supplementary file 1 [file 576669%20Supplementary%20Material.doc]

**Supplementary Table 1:** List of Instrument Characteristics for Proteins Included in MR Analysis

| **Protein** | **SNP number** | **Mean F** | **Min F** | **Mean R2** |
| --- | --- | --- | --- | --- |
| A1BG | 4 | 626.4947 | 57.9053 | 0.001639 |
| A4GALT | 4 | 318.5053 | 32.3954 | 0.003906 |
| A4GNT | 1 | 58.2834 | 58.2834 | 0.000693 |
| AASDHPPT | 1 | 31.162 | 31.162 | 0.000263 |
| ABHD10 | 1 | 35.0099 | 35.0099 | 0.000469 |
| ABLIM3 | 1 | 201.8848 | 201.8848 | 0.000483 |
| ABO | 9 | 971.613 | 56.8647 | 0.010859 |
| ACAA1 | 5 | 490.8042 | 44.4227 | 0.002113 |
| ACADM | 1 | 685.4245 | 685.4245 | 0.008099 |
| ACADSB | 2 | 118.9874 | 80.6397 | 0.000575 |
| ACADVL | 1 | 37.0356 | 37.0356 | 0.000516 |
| ACAN | 2 | 125.0543 | 76.9238 | 0.001025 |
| ACAP2 | 1 | 39.0937 | 39.0937 | 0.000398 |
| ACAT1 | 1 | 127.2258 | 127.2258 | 0.001111 |
| ACAT2 | 4 | 296.3906 | 32.8363 | 0.00366 |
| ACBD6 | 1 | 36.5367 | 36.5367 | 0.000065 |
| ACBD7 | 1 | 32.8873 | 32.8873 | 0.000461 |
| ACE | 10 | 266.8949 | 67.5124 | 0.001763 |
| ACOT13 | 1 | 47.535 | 47.535 | 0.000046 |
| ACP1 | 8 | 939.4662 | 63.5646 | 0.00437 |
| ACP5 | 3 | 255.743 | 33.3022 | 0.003004 |
| ACP6 | 13 | 453.7809 | 37.0652 | 0.000771 |
| ACSF2 | 1 | 31.2371 | 31.2371 | 0.000197 |
| ACVRL1 | 3 | 199.571 | 33.5276 | 0.000931 |
| ACY1 | 2 | 270.9737 | 32.9165 | 0.000282 |
| ACYP2 | 3 | 275.8168 | 31.9274 | 0.003528 |
| ADA2 | 7 | 266.9019 | 33.7483 | 0.002976 |
| ADAM22 | 4 | 418.9639 | 39.5369 | 0.005453 |
| ADAM23 | 11 | 429.6936 | 38.8526 | 0.001142 |
| ADAM9 | 1 | 32.9734 | 32.9734 | 0.00006 |
| ADAMTS13 | 8 | 421.1602 | 31.6444 | 0.001317 |
| ADAMTS5 | 5 | 586.6537 | 30.8732 | 0.00347 |
| ADAMTSL1 | 7 | 240.4784 | 35.113 | 0.000529 |
| ADAMTSL2 | 4 | 80.9192 | 36.0543 | 0.001026 |
| ADGRE2 | 8 | 247.1264 | 34.7019 | 0.002265 |
| ADGRE5 | 5 | 87.3064 | 42.8249 | 0.000096 |
| ADGRF5 | 8 | 310.473 | 29.9859 | 0.000262 |
| ADGRG1 | 1 | 99.2613 | 99.2613 | 0.001401 |
| ADH1A | 1 | 149.2608 | 149.2608 | 0.000149 |
| ADH1C | 1 | 245.4805 | 245.4805 | 0.003458 |
| ADH4 | 1 | 172.6365 | 172.6365 | 0.002379 |
| ADH5 | 3 | 154.8387 | 37.6418 | 0.000456 |
| ADH6 | 3 | 161.6488 | 56.1035 | 0.000448 |
| ADH7 | 4 | 234.1244 | 31.0078 | 0.001135 |
| ADI1 | 1 | 92.2388 | 92.2388 | 0.000599 |
| ADIPOQ | 5 | 189.5238 | 33.9748 | 0.000526 |
| ADK | 1 | 36.9161 | 36.9161 | 0.000394 |
| ADM2 | 1 | 181.9441 | 181.9441 | 0.001383 |
| ADPRS | 3 | 151.4063 | 51.4852 | 0.000129 |
| ADSS1 | 3 | 373.4969 | 44.8004 | 0.002789 |
| AFM | 3 | 191.2695 | 44.635 | 0.000158 |
| AGER | 3 | 390.2037 | 38.827 | 0.001455 |
| AGFG1 | 1 | 135.4289 | 135.4289 | 0.001746 |
| AGRN | 5 | 223.551 | 41.2649 | 0.002429 |
| AGRP | 4 | 211.8538 | 53.2131 | 0.000427 |
| AGT | 2 | 227.2891 | 41.2914 | 0.001213 |
| AHSG | 5 | 505.7334 | 34.4182 | 0.005826 |
| AIF1 | 4 | 93.4209 | 32.1613 | 0.001009 |
| AIF1L | 5 | 620.2017 | 44.3698 | 0.006185 |
| AK1 | 1 | 40.4361 | 40.4361 | 0.000422 |
| AKR1A1 | 7 | 417.1303 | 36.9088 | 0.000692 |
| AKR1B1 | 2 | 54.0978 | 41.8126 | 0.000042 |
| AKR1C3 | 6 | 106.5596 | 37.5529 | 0.001005 |
| AKR1C4 | 6 | 451.4135 | 59.8475 | 0.005481 |
| AKR1D1 | 1 | 30.7463 | 30.7463 | 0.000249 |
| AKR7A2 | 1 | 305.768 | 305.768 | 0.003773 |
| AKR7A3 | 6 | 176.9856 | 48.0144 | 0.00142 |
| ALAD | 7 | 161.2864 | 30.1375 | 0.000715 |
| ALCAM | 4 | 82.1189 | 40.3504 | 0.0002 |
| ALDH1A1 | 1 | 118.464 | 118.464 | 0.001221 |
| ALDH2 | 1 | 99.6884 | 99.6884 | 0.001112 |
| ALDH3A1 | 1 | 234.3056 | 234.3056 | 0.002948 |
| ALDH3B1 | 1 | 206.9948 | 206.9948 | 0.002092 |
| ALDH6A1 | 2 | 80.3504 | 53.5121 | 0.000547 |
| ALDOB | 1 | 83.8052 | 83.8052 | 0.00005 |
| ALDOC | 2 | 151.4115 | 54.9186 | 0.000098 |
| ALKBH3 | 3 | 314.129 | 75.2322 | 0.003959 |
| ALOX15B | 1 | 73.995 | 73.995 | 0.000869 |
| ALPG | 5 | 142.8054 | 41.6931 | 0.001065 |
| AMBP | 2 | 106.0066 | 67.6046 | 0.001021 |
| AMIGO2 | 3 | 75.9494 | 38.2962 | 0.000735 |
| AMY1A | 8 | 956.9528 | 112.6899 | 0.002484 |
| AMY2A | 5 | 419.332 | 72.9756 | 0.004402 |
| AMY2B | 6 | 384.8551 | 36.9644 | 0.003098 |
| ANG | 7 | 343.8801 | 31.9148 | 0.002975 |
| ANGPT1 | 1 | 63.9662 | 63.9662 | 0.000832 |
| ANGPT2 | 2 | 127.7801 | 37.6269 | 0.001576 |
| ANGPTL1 | 7 | 210.0903 | 36.1881 | 0.002725 |
| ANGPTL3 | 6 | 233.0921 | 30.0326 | 0.001593 |
| ANGPTL4 | 1 | 151.9092 | 151.9092 | 0.000203 |
| ANKRD27 | 1 | 41.3242 | 41.3242 | 0.000562 |
| ANTXR1 | 1 | 30.7183 | 30.7183 | 0.000417 |
| ANTXR2 | 2 | 247.7401 | 42.122 | 0.002278 |
| ANXA1 | 1 | 176.8424 | 176.8424 | 0.000253 |
| ANXA11 | 3 | 138.699 | 34.744 | 0.00166 |
| ANXA2 | 10 | 437.4307 | 39.1262 | 0.00509 |
| ANXA4 | 2 | 472.7649 | 33.8901 | 0.00442 |
| ANXA5 | 2 | 194.1166 | 102.3838 | 0.001099 |
| ANXA7 | 4 | 74.7046 | 37.0137 | 0.000051 |
| AOC1 | 9 | 2249.5581 | 40.5369 | 0.018453 |
| AOC2 | 2 | 54.6552 | 44.5421 | 0.000082 |
| AP1G2 | 3 | 173.8661 | 37.5198 | 0.000462 |
| AP2A2 | 1 | 55.3224 | 55.3224 | 0.000704 |
| AP4M1 | 1 | 30.9778 | 30.9778 | 0.000429 |
| APCS | 3 | 323.1067 | 70.9991 | 0.001185 |
| APLP2 | 1 | 282.0653 | 282.0653 | 0.000943 |
| APMAP | 2 | 120.1764 | 72.635 | 0.000944 |
| APOA1 | 4 | 250.4142 | 61.0371 | 0.000593 |
| APOA4 | 2 | 79.3446 | 46.1001 | 0.000354 |
| APOA5 | 6 | 557.9522 | 44.0586 | 0.001918 |
| APOB | 1 | 51.802 | 51.802 | 0.000353 |
| APOBEC3G | 2 | 124.1966 | 56.7575 | 0.00143 |
| APOC1 | 4 | 407.3144 | 71.8486 | 0.005347 |
| APOC3 | 2 | 171.7073 | 52.2079 | 0.000905 |
| APOE | 6 | 175.0182 | 34.4108 | 0.001648 |
| APOF | 4 | 153.2114 | 36.9001 | 0.000627 |
| APOH | 3 | 913.823 | 133.8466 | 0.000837 |
| APOL1 | 5 | 552.9556 | 33.9386 | 0.005728 |
| APOL3 | 7 | 382.1838 | 32.7585 | 0.001952 |
| APOM | 5 | 159.2929 | 43.3439 | 0.000649 |
| APP | 1 | 78.6082 | 78.6082 | 0.000962 |
| APRT | 5 | 193.301 | 51.3002 | 0.000296 |
| ARF4 | 2 | 73.2961 | 43.0214 | 0.000764 |
| ARFIP1 | 2 | 369.6958 | 41.6144 | 0.004691 |
| ARG1 | 2 | 82.8413 | 40.0894 | 0.000577 |
| ARHGAP25 | 1 | 339.0281 | 339.0281 | 0.003405 |
| ARHGAP45 | 1 | 228.7398 | 228.7398 | 0.002955 |
| ARHGEF25 | 2 | 124.2614 | 33.9717 | 0.00086 |
| ARL3 | 2 | 207.0946 | 92.0995 | 0.001386 |
| ARL4D | 1 | 41.4432 | 41.4432 | 0.000513 |
| ARPC1B | 1 | 100.1208 | 100.1208 | 0.000209 |
| ARRB1 | 1 | 82.64 | 82.64 | 0.000988 |
| ARSA | 1 | 82.5884 | 82.5884 | 0.000427 |
| ARSB | 2 | 160.0147 | 43.9781 | 0.002186 |
| ARSK | 1 | 88.7421 | 88.7421 | 0.000191 |
| ART3 | 5 | 207.0004 | 45.726 | 0.001927 |
| ART4 | 15 | 337.483 | 42.2439 | 0.001548 |
| AS3MT | 1 | 35.0108 | 35.0108 | 0.000371 |
| ASAH2 | 7 | 1076.8688 | 71.4417 | 0.005074 |
| ASB9 | 1 | 30.2791 | 30.2791 | 0.000482 |
| ASF1A | 1 | 150.8836 | 150.8836 | 0.00117 |
| ASGR1 | 2 | 76.8664 | 32.315 | 0.000794 |
| ASIP | 2 | 615.6261 | 137.3395 | 0.003014 |
| ASL | 2 | 146.0376 | 117.4668 | 0.000811 |
| ASPH | 2 | 91.0187 | 49.8793 | 0.00042 |
| ASPN | 6 | 246.7624 | 40.1557 | 0.002576 |
| ASRGL1 | 2 | 318.898 | 40.0222 | 0.003822 |
| ATF6 | 1 | 34.5671 | 34.5671 | 0.000465 |
| ATF6B | 4 | 170.7523 | 49.5259 | 0.001735 |
| ATOX1 | 1 | 68.1502 | 68.1502 | 0.000928 |
| ATP1B2 | 4 | 333.444 | 31.1973 | 0.00429 |
| ATRN | 9 | 300.303 | 38.8334 | 0.000424 |
| ATXN3 | 4 | 260.607 | 41.3876 | 0.00311 |
| AZGP1 | 2 | 377.8956 | 35.9484 | 0.0045 |
| B3GALT6 | 1 | 39.1644 | 39.1644 | 0.000275 |
| B3GAT3 | 4 | 264.9733 | 29.8009 | 0.003125 |
| B3GLCT | 2 | 455.8339 | 43.4198 | 0.004393 |
| B3GNT2 | 3 | 192.8764 | 40.0936 | 0.0024 |
| B3GNT8 | 8 | 389.7613 | 77.8913 | 0.002818 |
| B4GALT1 | 3 | 170.4242 | 30.8792 | 0.000741 |
| B4GALT2 | 3 | 214.9965 | 31.6866 | 0.000443 |
| B4GALT6 | 8 | 573.7801 | 80.471 | 0.001188 |
| B4GALT7 | 7 | 286.7792 | 53.798 | 0.000479 |
| BCAM | 6 | 614.587 | 58.8296 | 0.000749 |
| BCAN | 2 | 298.8455 | 37.3472 | 0.003836 |
| BCAT2 | 1 | 309.6881 | 309.6881 | 0.003106 |
| BCHE | 3 | 1184.9065 | 77.771 | 0.01412 |
| BCL10 | 1 | 43.2659 | 43.2659 | 0.000539 |
| BDH2 | 3 | 253.3399 | 50.0273 | 0.003205 |
| BDNF | 4 | 58.556 | 30.1818 | 0.000205 |
| BET1L | 1 | 180.8551 | 180.8551 | 0.001914 |
| BID | 1 | 90.292 | 90.292 | 0.000066 |
| BIN1 | 2 | 137.3735 | 32.3979 | 0.001781 |
| BLVRA | 1 | 60.0963 | 60.0963 | 0.000038 |
| BLVRB | 2 | 59.3586 | 43.0557 | 0.000061 |
| BMP1 | 1 | 71.7609 | 71.7609 | 0.000655 |
| BMP7 | 1 | 42.463 | 42.463 | 0.000427 |
| BMPER | 4 | 74.0573 | 32.3676 | 0.000554 |
| BOC | 4 | 181.4493 | 41.6628 | 0.001333 |
| BOLA1 | 4 | 847.9526 | 42.4951 | 0.003562 |
| BOLA3 | 1 | 193.7817 | 193.7817 | 0.002642 |
| BPGM | 1 | 35.6341 | 35.6341 | 0.000503 |
| BPHL | 2 | 172.6581 | 160.7912 | 0.00069 |
| BPI | 5 | 468.6861 | 32.1146 | 0.003685 |
| BPIFA2 | 1 | 87.8642 | 87.8642 | 0.00124 |
| BPIFB1 | 7 | 367.4486 | 51.1728 | 0.002634 |
| BPNT1 | 1 | 47.0076 | 47.0076 | 0.00042 |
| BPNT2 | 6 | 313.693 | 32.6639 | 0.000656 |
| BRD2 | 3 | 35.6791 | 30.5861 | 0.000266 |
| BRSK2 | 2 | 178.1662 | 41.9823 | 0.001784 |
| BST1 | 10 | 1867.0567 | 51.3384 | 0.009628 |
| BTC | 2 | 155.9228 | 79.5487 | 0.000705 |
| BTD | 9 | 523.3338 | 31.8394 | 0.001334 |
| BTN3A1 | 1 | 31.6394 | 31.6394 | 0.000155 |
| BTN3A3 | 10 | 1583.0672 | 58.9615 | 0.006457 |
| BTNL8 | 2 | 207.7288 | 65.7377 | 0.002612 |
| C1QC | 11 | 209.2083 | 33.3268 | 0.000415 |
| C1QL1 | 3 | 268.3229 | 38.4202 | 0.00326 |
| C1QTNF3 | 2 | 137.1615 | 34.5563 | 0.00085 |
| C1QTNF5 | 2 | 315.9389 | 100.8547 | 0.002373 |
| C1QTNF9 | 1 | 580.1347 | 580.1347 | 0.006768 |
| C1R | 2 | 57.468 | 38.1472 | 0.000102 |
| C1RL | 4 | 84.5551 | 33.7836 | 0.000111 |
| C1S | 3 | 64.8657 | 39.1125 | 0.000478 |
| C1orf198 | 1 | 143.7598 | 143.7598 | 0.000916 |
| C1orf56 | 3 | 108.1943 | 56.8759 | 0.000372 |
| C2 | 5 | 1166.3542 | 75.9817 | 0.003248 |
| C3 | 5 | 79.8766 | 46.2449 | 0.000695 |
| C4BPA | 4 | 345.4388 | 59.0023 | 0.002279 |
| C5 | 4 | 119.1977 | 39.2223 | 0.001107 |
| C6 | 4 | 225.9923 | 39.1965 | 0.000618 |
| C7 | 5 | 327.743 | 37.5905 | 0.003448 |
| C8G | 4 | 560.1778 | 44.9021 | 0.0069 |
| C9 | 5 | 100.249 | 56.8115 | 0.000144 |
| CA1 | 3 | 137.0784 | 34.7223 | 0.000151 |
| CA10 | 4 | 227.7071 | 48.1121 | 0.00164 |
| CA11 | 1 | 289.0661 | 289.0661 | 0.00221 |
| CA12 | 1 | 33.5826 | 33.5826 | 0.000415 |
| CA13 | 3 | 510.4841 | 47.9524 | 0.002842 |
| CA3 | 5 | 146.56 | 33.092 | 0.000998 |
| CA6 | 8 | 234.8716 | 38.3999 | 0.001298 |
| CA8 | 6 | 589.9838 | 41.1681 | 0.006735 |
| CACNA2D3 | 8 | 166.7191 | 31.6233 | 0.001498 |
| CACYBP | 1 | 220.0247 | 220.0247 | 0.001064 |
| CADM1 | 1 | 306.6975 | 306.6975 | 0.003736 |
| CALB2 | 1 | 38.1635 | 38.1635 | 0.000465 |
| CALCB | 3 | 293.9799 | 29.9909 | 0.003215 |
| CALCOCO2 | 1 | 112.1044 | 112.1044 | 0.000887 |
| CAMK2D | 1 | 30.3381 | 30.3381 | 0.000429 |
| CAMP | 3 | 83.3701 | 77.7693 | 0.000424 |
| CAPG | 4 | 726.4874 | 41.5945 | 0.002238 |
| CAPN2 | 3 | 191.9912 | 36.3871 | 0.000537 |
| CASP3 | 1 | 327.2735 | 327.2735 | 0.001924 |
| CASS4 | 1 | 49.9853 | 49.9853 | 0.000206 |
| CAT | 2 | 288.1162 | 92.3237 | 0.002918 |
| CBL | 1 | 193.7872 | 193.7872 | 0.000527 |
| CBLIF | 2 | 257.7899 | 65.1592 | 0.000302 |
| CBLN1 | 8 | 147.4024 | 32.6577 | 0.000237 |
| CBLN4 | 5 | 180.161 | 37.1374 | 0.001919 |
| CBR1 | 3 | 449.014 | 56.9857 | 0.000923 |
| CBR3 | 5 | 508.1367 | 35.3017 | 0.005919 |
| CCDC126 | 5 | 245.4631 | 31.3978 | 0.002587 |
| CCDC134 | 2 | 97.1478 | 32.1737 | 0.001213 |
| CCDC50 | 1 | 34.7075 | 34.7075 | 0.000389 |
| CCDC80 | 2 | 83.674 | 45.2916 | 0.001101 |
| CCL11 | 2 | 120.656 | 46.443 | 0.001634 |
| CCL14 | 5 | 259.4348 | 41.7663 | 0.000715 |
| CCL15 | 8 | 349.0428 | 30.221 | 0.000468 |
| CCL16 | 9 | 736.5656 | 35.1484 | 0.001428 |
| CCL17 | 2 | 448.1633 | 271.7538 | 0.003029 |
| CCL18 | 6 | 344.2626 | 42.9998 | 0.001184 |
| CCL19 | 1 | 31.7546 | 31.7546 | 0.000399 |
| CCL21 | 2 | 103.704 | 43.144 | 0.00079 |
| CCL22 | 5 | 251.8494 | 53.0644 | 0.000772 |
| CCL23 | 12 | 320.5079 | 31.5351 | 0.000638 |
| CCL25 | 8 | 286.1206 | 63.5607 | 0.002468 |
| CCL27 | 1 | 30.8134 | 30.8134 | 0.000147 |
| CCL28 | 1 | 45.0174 | 45.0174 | 0.000635 |
| CCL3 | 3 | 356.275 | 31.3206 | 0.001965 |
| CCL5 | 2 | 316.2767 | 31.6734 | 0.002569 |
| CCL7 | 10 | 389.9048 | 33.2229 | 0.000693 |
| CCL8 | 8 | 596.3053 | 32.3548 | 0.005548 |
| CCM2 | 1 | 46.2425 | 46.2425 | 0.000372 |
| CCN3 | 1 | 69.5882 | 69.5882 | 0.000719 |
| CCN4 | 7 | 745.232 | 37.7912 | 0.008271 |
| CCN5 | 5 | 475.4516 | 109.575 | 0.002975 |
| CCNH | 1 | 95.6163 | 95.6163 | 0.000872 |
| CCS | 1 | 197.2356 | 197.2356 | 0.002752 |
| CCT5 | 1 | 45.9622 | 45.9622 | 0.000085 |
| CD109 | 7 | 574.9165 | 42.6907 | 0.005584 |
| CD14 | 6 | 252.5738 | 36.0946 | 0.002515 |
| CD160 | 1 | 274.6852 | 274.6852 | 0.003846 |
| CD177 | 8 | 994.3433 | 39.6187 | 0.003427 |
| CD200 | 1 | 65.7183 | 65.7183 | 0.000235 |
| CD200R1 | 1 | 187.0009 | 187.0009 | 0.002392 |
| CD209 | 6 | 281.8158 | 34.1312 | 0.002647 |
| CD244 | 2 | 66.9481 | 33.9774 | 0.000097 |
| CD248 | 2 | 33.1697 | 30.1817 | 0.000059 |
| CD274 | 2 | 390.356 | 33.9307 | 0.004109 |
| CD300A | 8 | 745.8167 | 34.4798 | 0.00552 |
| CD300C | 6 | 233.8316 | 61.4801 | 0.00052 |
| CD33 | 10 | 658.2957 | 30.9129 | 0.007854 |
| CD36 | 3 | 166.7787 | 31.0668 | 0.002002 |
| CD4 | 1 | 38.7882 | 38.7882 | 0.000363 |
| CD46 | 2 | 453.1285 | 45.4402 | 0.006098 |
| CD48 | 5 | 284.2777 | 66.4373 | 0.001335 |
| CD55 | 4 | 288.4014 | 42.4986 | 0.002203 |
| CD58 | 2 | 310.0204 | 32.0364 | 0.000365 |
| CD59 | 3 | 190.0706 | 37.812 | 0.002293 |
| CD5L | 4 | 295.438 | 44.3811 | 0.003581 |
| CD68 | 2 | 56.5088 | 51.0302 | 0.000066 |
| CD7 | 4 | 162.0338 | 30.5773 | 0.000335 |
| CD72 | 2 | 129.233 | 51.4281 | 0.000405 |
| CD86 | 1 | 51.2521 | 51.2521 | 0.000496 |
| CD8A | 2 | 665.6535 | 95.4656 | 0.005006 |
| CDCP1 | 4 | 258.8427 | 37.855 | 0.002034 |
| CDH17 | 5 | 290.9439 | 33.994 | 0.003478 |
| CDH5 | 2 | 175.2357 | 40.9596 | 0.002041 |
| CDHR5 | 1 | 44.4842 | 44.4842 | 0.000368 |
| CDKN1B | 1 | 81.9226 | 81.9226 | 0.000414 |
| CDNF | 5 | 318.0559 | 36.3494 | 0.000658 |
| CDON | 4 | 778.5527 | 59.9277 | 0.003459 |
| CEACAM8 | 2 | 56.2566 | 42.1688 | 0.000522 |
| CEL | 7 | 266.2311 | 32.156 | 0.000651 |
| CELA2A | 1 | 133.9406 | 133.9406 | 0.000434 |
| CEMIP2 | 2 | 189.3134 | 31.0885 | 0.002238 |
| CES1 | 1 | 31.3254 | 31.3254 | 0.000074 |
| CETN3 | 1 | 81.0914 | 81.0914 | 0.000942 |
| CFB | 5 | 543.64 | 101.7808 | 0.003002 |
| CFD | 7 | 72.8459 | 30.341 | 0.0002 |
| CFH | 3 | 265.8401 | 33.8101 | 0.002114 |
| CFHR1 | 11 | 403.2953 | 31.1021 | 0.000802 |
| CFHR2 | 9 | 1825.8247 | 89.9054 | 0.00401 |
| CFHR3 | 1 | 182.8334 | 182.8334 | 0.002478 |
| CFHR4 | 15 | 535.2692 | 38.1361 | 0.001102 |
| CFHR5 | 8 | 613.9733 | 45.0064 | 0.002567 |
| CFI | 3 | 213.6205 | 32.7062 | 0.002605 |
| CFL2 | 1 | 191.9739 | 191.9739 | 0.001336 |
| CHAD | 1 | 34.4034 | 34.4034 | 0.000426 |
| CHGA | 5 | 196.4026 | 30.2683 | 0.001224 |
| CHGB | 1 | 68.2162 | 68.2162 | 0.000054 |
| CHI3L1 | 14 | 620.3913 | 31.3879 | 0.003023 |
| CHI3L2 | 1 | 51.7953 | 51.7953 | 0.000335 |
| CHIT1 | 10 | 372.5916 | 36.6112 | 0.001125 |
| CHKB | 4 | 123.644 | 59.1731 | 0.000391 |
| CHL1 | 8 | 155.4465 | 31.0102 | 0.001221 |
| CHMP2B | 3 | 308.7261 | 31.2898 | 0.003649 |
| CHMP3 | 1 | 40.7238 | 40.7238 | 0.000548 |
| CHRD | 1 | 115.2014 | 115.2014 | 0.000331 |
| CHRDL2 | 5 | 323.1428 | 33.8702 | 0.001573 |
| CHST11 | 6 | 247.0701 | 32.2203 | 0.002657 |
| CHST12 | 2 | 236.226 | 41.6467 | 0.002065 |
| CHST15 | 2 | 98.0492 | 79.3402 | 0.001192 |
| CHST4 | 1 | 83.4892 | 83.4892 | 0.000888 |
| CHST9 | 4 | 277.5089 | 38.1214 | 0.003293 |
| CILP2 | 1 | 103.7406 | 103.7406 | 0.000777 |
| CINP | 1 | 39.4062 | 39.4062 | 0.000464 |
| CKMT1A | 1 | 189.0495 | 189.0495 | 0.000796 |
| CKMT2 | 1 | 30.4526 | 30.4526 | 0.000033 |
| CLEC11A | 11 | 216.9789 | 35.656 | 0.000434 |
| CLEC12A | 7 | 1695.1149 | 34.2876 | 0.017939 |
| CLEC1B | 2 | 184.9496 | 57.1534 | 0.001631 |
| CLEC3B | 2 | 249.4684 | 47.6611 | 0.00232 |
| CLEC4C | 1 | 82.3496 | 82.3496 | 0.000835 |
| CLEC4G | 1 | 166.6801 | 166.6801 | 0.000651 |
| CLIC5 | 5 | 611.3086 | 30.6866 | 0.00085 |
| CLINT1 | 1 | 44.9372 | 44.9372 | 0.000318 |
| CLMP | 3 | 253.3261 | 43.5746 | 0.003419 |
| CLN5 | 1 | 157.6817 | 157.6817 | 0.000729 |
| CLPS | 8 | 435.3814 | 35.6615 | 0.004701 |
| CLSTN1 | 6 | 307.8119 | 41.2561 | 0.000339 |
| CLSTN2 | 6 | 190.432 | 44.6167 | 0.000913 |
| CMBL | 2 | 193.3175 | 66.0005 | 0.002099 |
| CMPK1 | 1 | 109.2884 | 109.2884 | 0.000375 |
| CNDP1 | 6 | 312.5666 | 34.3144 | 0.003527 |
| CNN1 | 1 | 155.9202 | 155.9202 | 0.000364 |
| CNP | 1 | 82.3978 | 82.3978 | 0.000971 |
| CNPY3 | 1 | 241.2443 | 241.2443 | 0.002726 |
| CNRIP1 | 8 | 403.6658 | 32.1448 | 0.001499 |
| CNTFR | 4 | 212.6994 | 44.7257 | 0.000417 |
| CNTN1 | 4 | 287.1923 | 45.8202 | 0.002938 |
| CNTN2 | 8 | 405.4552 | 43.876 | 0.003021 |
| CNTN4 | 8 | 227.3284 | 30.0954 | 0.00167 |
| CNTN5 | 5 | 196.0938 | 30.7004 | 0.000877 |
| CNTNAP2 | 8 | 231.5068 | 32.1767 | 0.001707 |
| COCH | 4 | 387.4423 | 34.0054 | 0.001806 |
| COL10A1 | 3 | 328.1175 | 67.2557 | 0.003426 |
| COL11A2 | 5 | 195.0724 | 32.8254 | 0.002235 |
| COL15A1 | 4 | 179.601 | 34.4667 | 0.001617 |
| COL18A1 | 5 | 104.7733 | 34.3709 | 0.000817 |
| COL1A1 | 4 | 92.7826 | 46.9611 | 0.000257 |
| COL28A1 | 1 | 31.1992 | 31.1992 | 0.000429 |
| COL2A1 | 7 | 792.5903 | 59.4898 | 0.006508 |
| COL3A1 | 2 | 43.3203 | 36.0919 | 0.000463 |
| COL6A1 | 9 | 1603.4138 | 60.2214 | 0.012971 |
| COL6A2 | 6 | 242.5479 | 42.8844 | 0.000943 |
| COL6A3 | 4 | 93.3912 | 30.8684 | 0.000991 |
| COL9A1 | 2 | 50.9662 | 31.2369 | 0.000466 |
| COLEC10 | 1 | 49.3103 | 49.3103 | 0.000037 |
| COLEC11 | 10 | 874.3115 | 31.9616 | 0.006308 |
| COLEC12 | 3 | 117.5227 | 61.3756 | 0.001188 |
| COLGALT1 | 3 | 101.1278 | 32.1079 | 0.001265 |
| COMP | 4 | 178.3293 | 32.7334 | 0.000371 |
| COMT | 1 | 98.7172 | 98.7172 | 0.001364 |
| CP | 1 | 29.8334 | 29.8334 | 0.000054 |
| CPA4 | 10 | 1281.6328 | 35.4831 | 0.005088 |
| CPB1 | 2 | 322.7011 | 44.676 | 0.003278 |
| CPB2 | 5 | 688.3796 | 75.4486 | 0.008424 |
| CPLX1 | 1 | 50.2688 | 50.2688 | 0.000699 |
| CPLX2 | 1 | 42.999 | 42.999 | 0.000409 |
| CPM | 2 | 106.2311 | 87.316 | 0.001243 |
| CPN2 | 10 | 173.4158 | 29.8632 | 0.001375 |
| CPNE1 | 6 | 1164.0405 | 92.8512 | 0.003165 |
| CPOX | 2 | 147.2415 | 36.8675 | 0.00089 |
| CPQ | 7 | 778.439 | 50.1837 | 0.001188 |
| CPXM1 | 6 | 268.0443 | 48.2584 | 0.001668 |
| CPZ | 2 | 67.9042 | 65.6038 | 0.000948 |
| CR1 | 5 | 275.1548 | 57.7409 | 0.003155 |
| CR2 | 5 | 133.9413 | 41.3436 | 0.000925 |
| CRABP2 | 4 | 322.4215 | 33.7412 | 0.004249 |
| CRADD | 2 | 37.4198 | 32.9974 | 0.0002 |
| CRAT | 1 | 109.631 | 109.631 | 0.001339 |
| CREB3L4 | 3 | 237.5023 | 30.137 | 0.002898 |
| CREG1 | 2 | 246.1949 | 122.7715 | 0.002052 |
| CRELD1 | 11 | 754.8716 | 30.995 | 0.004543 |
| CRH | 1 | 33.4568 | 33.4568 | 0.000052 |
| CRHBP | 6 | 651.3164 | 66.9552 | 0.007152 |
| CRIP2 | 1 | 32.5628 | 32.5628 | 0.00004 |
| CRISP2 | 6 | 1383.1233 | 35.872 | 0.010601 |
| CRISPLD2 | 6 | 220.9933 | 35.6329 | 0.000371 |
| CRLF1 | 2 | 389.0021 | 33.4758 | 0.003745 |
| CRNN | 1 | 262.3797 | 262.3797 | 0.001107 |
| CROT | 5 | 563.699 | 34.1103 | 0.002887 |
| CRP | 2 | 199.4648 | 48.9029 | 0.002184 |
| CRTAC1 | 10 | 383.138 | 31.9496 | 0.004394 |
| CRTAM | 6 | 188.6924 | 32.013 | 0.001758 |
| CRYBB1 | 1 | 420.0536 | 420.0536 | 0.005634 |
| CRYGD | 1 | 193.7208 | 193.7208 | 0.002433 |
| CRYZ | 7 | 916.22 | 73.8769 | 0.004558 |
| CSF1R | 2 | 118.3303 | 66.8071 | 0.001295 |
| CSF2RB | 6 | 395.9664 | 30.1007 | 0.004985 |
| CSGALNACT2 | 1 | 188.5136 | 188.5136 | 0.002361 |
| CSK | 1 | 55.9831 | 55.9831 | 0.000622 |
| CSNK2B | 1 | 37.1587 | 37.1587 | 0.000479 |
| CSRP1 | 1 | 118.803 | 118.803 | 0.001454 |
| CST1 | 6 | 646.7097 | 37.4465 | 0.00556 |
| CST2 | 6 | 415.9071 | 39.5965 | 0.002414 |
| CST3 | 3 | 255.2502 | 35.1264 | 0.002263 |
| CST4 | 5 | 230.7076 | 34.0927 | 0.001206 |
| CST5 | 6 | 441.3156 | 39.9458 | 0.004169 |
| CST6 | 2 | 202.9536 | 55.8514 | 0.000379 |
| CST7 | 6 | 819.3402 | 50.5833 | 0.00342 |
| CTRB1 | 5 | 300.5242 | 45.0894 | 0.001192 |
| CTRB2 | 10 | 393.2102 | 30.8562 | 0.000824 |
| CTSB | 7 | 417.3487 | 36.8931 | 0.001582 |
| CTSD | 5 | 189.5167 | 33.9088 | 0.001158 |
| CTSE | 3 | 859.3671 | 41.8795 | 0.005942 |
| CTSF | 1 | 444.0506 | 444.0506 | 0.005292 |
| CTSH | 10 | 691.2029 | 32.8655 | 0.00319 |
| CTSO | 2 | 186.5682 | 36.399 | 0.001927 |
| CTSS | 3 | 611.9319 | 95.5651 | 0.004478 |
| CTSV | 4 | 149.782 | 31.6185 | 0.00198 |
| CTSZ | 4 | 274.858 | 46.2611 | 0.000816 |
| CX3CL1 | 1 | 75.005 | 75.005 | 0.000042 |
| CXCL1 | 11 | 224.6019 | 46.7242 | 0.000357 |
| CXCL10 | 1 | 72.5119 | 72.5119 | 0.001024 |
| CXCL11 | 4 | 309.9559 | 57.1645 | 0.003584 |
| CXCL12 | 3 | 110.7774 | 45.4923 | 0.001208 |
| CXCL16 | 5 | 142.5896 | 31.65 | 0.001147 |
| CXCL5 | 1 | 327.9281 | 327.9281 | 0.002402 |
| CXCL6 | 5 | 1478.4395 | 62.7706 | 0.018167 |
| CXCL8 | 1 | 30.0034 | 30.0034 | 0.00004 |
| CXCL9 | 1 | 60.1264 | 60.1264 | 0.000568 |
| CYB5A | 1 | 101.3894 | 101.3894 | 0.000883 |
| CYB5D2 | 4 | 286.8396 | 33.7357 | 0.000556 |
| CYB5R2 | 6 | 177.0159 | 31.444 | 0.002123 |
| CYRIB | 1 | 38.1421 | 38.1421 | 0.000532 |
| CYTL1 | 4 | 715.5061 | 39.3087 | 0.005887 |
| DAPK2 | 3 | 371.5826 | 33.3747 | 0.004676 |
| DAPP1 | 2 | 68.5286 | 35.5142 | 0.000726 |
| DARS1 | 1 | 56.8171 | 56.8171 | 0.000254 |
| DARS2 | 1 | 108.1947 | 108.1947 | 0.000177 |
| DBI | 2 | 382.1879 | 45.731 | 0.003194 |
| DBNL | 1 | 72.2207 | 72.2207 | 0.000935 |
| DCLK1 | 3 | 190.2274 | 39.4831 | 0.001738 |
| DCTD | 2 | 65.1216 | 30.4377 | 0.000738 |
| DCTPP1 | 1 | 38.028 | 38.028 | 0.000387 |
| DCXR | 1 | 122.3692 | 122.3692 | 0.001743 |
| DDOST | 1 | 77.9719 | 77.9719 | 0.000772 |
| DDT | 1 | 232.0937 | 232.0937 | 0.000441 |
| DECR1 | 2 | 49.8228 | 32.8671 | 0.000441 |
| DECR2 | 5 | 547.2007 | 44.6946 | 0.00546 |
| DEF6 | 2 | 196.051 | 31.3788 | 0.000443 |
| DEFA5 | 1 | 40.0939 | 40.0939 | 0.000025 |
| DEFB1 | 7 | 232.819 | 31.7325 | 0.002766 |
| DEFB104A | 7 | 147.484 | 30.7815 | 0.001472 |
| DEFB4A | 5 | 185.3926 | 35.7372 | 0.001136 |
| DHX58 | 2 | 283.4542 | 92.5688 | 0.002263 |
| DKK1 | 6 | 242.402 | 53.8465 | 0.00044 |
| DKK3 | 4 | 669.8174 | 30.7646 | 0.007709 |
| DKKL1 | 1 | 38.6128 | 38.6128 | 0.000375 |
| DLK1 | 6 | 609.7311 | 50.4699 | 0.007017 |
| DLK2 | 1 | 382.8031 | 382.8031 | 0.00401 |
| DLL1 | 2 | 89.1473 | 40.5051 | 0.001199 |
| DLL4 | 1 | 47.677 | 47.677 | 0.000062 |
| DMKN | 1 | 44.6649 | 44.6649 | 0.000276 |
| DNAJA4 | 1 | 69.1892 | 69.1892 | 0.000897 |
| DNAJB1 | 1 | 40.6078 | 40.6078 | 0.000557 |
| DNAJB11 | 3 | 98.2367 | 33.1991 | 0.0004 |
| DNAJB12 | 1 | 92.3907 | 92.3907 | 0.001156 |
| DNAJB14 | 1 | 48.6776 | 48.6776 | 0.000298 |
| DNAJB4 | 3 | 155.4798 | 44.1256 | 0.001037 |
| DNAJB6 | 1 | 39.8277 | 39.8277 | 0.000555 |
| DNAJB9 | 1 | 52.7167 | 52.7167 | 0.000051 |
| DNAJC10 | 1 | 92.9366 | 92.9366 | 0.000112 |
| DNAJC17 | 2 | 152.393 | 83.3383 | 0.000352 |
| DNAJC27 | 1 | 30.1731 | 30.1731 | 0.000173 |
| DNAJC30 | 2 | 214.9299 | 31.1072 | 0.000686 |
| DNER | 5 | 175.6332 | 31.093 | 0.002163 |
| DNPH1 | 1 | 130.5196 | 130.5196 | 0.000619 |
| DOC2B | 1 | 31.0391 | 31.0391 | 0.000391 |
| DOK2 | 1 | 32.2211 | 32.2211 | 0.000048 |
| DPEP1 | 9 | 332.9696 | 34.7045 | 0.001947 |
| DPEP2 | 2 | 172.052 | 90.1744 | 0.000472 |
| DPP7 | 7 | 224.414 | 39.5168 | 0.001874 |
| DPT | 7 | 281.4087 | 32.0219 | 0.002514 |
| DPY30 | 1 | 68.3608 | 68.3608 | 0.000394 |
| DSC2 | 3 | 147.7319 | 31.338 | 0.001179 |
| DSCAM | 2 | 206.1599 | 49.6452 | 0.000888 |
| DSG2 | 5 | 159.058 | 42.4227 | 0.001645 |
| DTD1 | 2 | 305.92 | 30.294 | 0.003901 |
| DTD2 | 1 | 147.3978 | 147.3978 | 0.000823 |
| DTX3L | 1 | 42.6438 | 42.6438 | 0.000591 |
| DTYMK | 4 | 50.2321 | 31.1175 | 0.000102 |
| DUSP13 | 1 | 331.7225 | 331.7225 | 0.004351 |
| DUSP28 | 2 | 261.7502 | 37.5688 | 0.000802 |
| DUT | 1 | 50.6244 | 50.6244 | 0.000341 |
| DYNLL2 | 1 | 41.7231 | 41.7231 | 0.000525 |
| EBI3 | 9 | 1206.9913 | 54.1288 | 0.008942 |
| ECH1 | 3 | 377.0846 | 32.6494 | 0.001687 |
| ECHS1 | 1 | 41.9993 | 41.9993 | 0.000449 |
| ECI1 | 3 | 128.7983 | 30.2055 | 0.00085 |
| ECI2 | 5 | 281.6617 | 34.27 | 0.003502 |
| ECM1 | 4 | 601.8231 | 201.5612 | 0.005788 |
| EDAR | 6 | 342.1324 | 42.4512 | 0.000542 |
| EDIL3 | 2 | 45.7587 | 35.8081 | 0.000612 |
| EFEMP1 | 3 | 128.3857 | 45.2058 | 0.001049 |
| EFNA3 | 1 | 40.7819 | 40.7819 | 0.000183 |
| EFNA5 | 2 | 154.5265 | 71.1214 | 0.002177 |
| EFNB1 | 1 | 29.7527 | 29.7527 | 0.000469 |
| EFNB2 | 2 | 50.7293 | 45.3411 | 0.000466 |
| EGF | 3 | 111.1257 | 51.5604 | 0.00018 |
| EGFLAM | 3 | 335.539 | 59.6381 | 0.001277 |
| EGFR | 3 | 89.7168 | 43.9728 | 0.001025 |
| EGLN1 | 5 | 204.901 | 50.4275 | 0.000821 |
| EHBP1 | 1 | 32.5734 | 32.5734 | 0.000184 |
| EIF1AD | 1 | 534.3927 | 534.3927 | 0.000627 |
| EIF2B1 | 1 | 49.9376 | 49.9376 | 0.000062 |
| ELANE | 8 | 287.8129 | 32.0569 | 0.00172 |
| ELMO1 | 3 | 71.1799 | 36.7643 | 0.000659 |
| EMILIN3 | 6 | 254.285 | 38.2298 | 0.000933 |
| ENDOU | 1 | 58.8004 | 58.8004 | 0.000687 |
| ENG | 4 | 207.4956 | 35.6004 | 0.00174 |
| ENGASE | 9 | 675.728 | 65.0546 | 0.001335 |
| ENO2 | 1 | 272.3771 | 272.3771 | 0.003144 |
| ENO3 | 3 | 399.1865 | 33.727 | 0.004515 |
| ENPEP | 7 | 281.9027 | 31.6234 | 0.002109 |
| ENPP2 | 4 | 127.3916 | 29.9151 | 0.001275 |
| ENPP5 | 7 | 647.5449 | 30.087 | 0.006285 |
| ENPP6 | 1 | 48.2638 | 48.2638 | 0.000072 |
| ENPP7 | 12 | 276.1044 | 38.1931 | 0.001294 |
| ENTPD1 | 3 | 144.7941 | 48.1124 | 0.0015 |
| ENTPD5 | 6 | 275.583 | 41.7639 | 0.00173 |
| ENTPD6 | 1 | 208.9493 | 208.9493 | 0.000362 |
| EPB41 | 2 | 51.4753 | 41.9092 | 0.000469 |
| EPHA1 | 4 | 451.9064 | 209.7008 | 0.004599 |
| EPHA10 | 1 | 77.8327 | 77.8327 | 0.000872 |
| EPHA2 | 3 | 134.6173 | 60.5412 | 0.001383 |
| EPHA4 | 3 | 150.4096 | 83.6505 | 0.001726 |
| EPHA5 | 3 | 73.9563 | 42.9247 | 0.000553 |
| EPHB1 | 5 | 275.3163 | 35.2725 | 0.003141 |
| EPHB2 | 4 | 289.309 | 36.7085 | 0.001461 |
| EPHB4 | 2 | 112.9128 | 42.0541 | 0.001592 |
| EPHB6 | 3 | 248.0697 | 57.9312 | 0.002028 |
| EPO | 1 | 69.3903 | 69.3903 | 0.000949 |
| ERAP1 | 7 | 2019.6428 | 215.846 | 0.016404 |
| ERAP2 | 11 | 1058.6185 | 112.4883 | 0.004798 |
| ERBB3 | 1 | 163.607 | 163.607 | 0.002215 |
| ERLEC1 | 1 | 84.1894 | 84.1894 | 0.000622 |
| ERO1B | 2 | 227.2942 | 33.8493 | 0.003076 |
| ESAM | 6 | 147.9155 | 32.5457 | 0.000906 |
| ESD | 3 | 263.4079 | 47.3336 | 0.001149 |
| ESM1 | 3 | 131.3287 | 49.1078 | 0.00135 |
| ESS2 | 1 | 103.9459 | 103.9459 | 0.000304 |
| ETFA | 1 | 46.9268 | 46.9268 | 0.000265 |
| EVA1C | 1 | 74.2826 | 74.2826 | 0.001017 |
| EVL | 4 | 179.1757 | 49.6154 | 0.001663 |
| F10 | 5 | 201.8366 | 36.8467 | 0.002271 |
| F11 | 5 | 294.1147 | 30.8694 | 0.003553 |
| F13B | 4 | 332.12 | 44.622 | 0.002036 |
| F2 | 5 | 91.4111 | 33.8018 | 0.000954 |
| F5 | 6 | 270.017 | 30.1389 | 0.001424 |
| F7 | 7 | 432.5078 | 50.9822 | 0.001387 |
| FABP1 | 1 | 162.0335 | 162.0335 | 0.002009 |
| FABP2 | 5 | 607.1222 | 68.1801 | 0.006386 |
| FABP4 | 1 | 75.1902 | 75.1902 | 0.00056 |
| FAH | 6 | 834.3329 | 36.6639 | 0.001551 |
| FAHD1 | 2 | 231.3306 | 80.5769 | 0.001451 |
| FAIM | 7 | 361.7599 | 43.9992 | 0.001317 |
| FAM151A | 6 | 187.3563 | 29.9996 | 0.002263 |
| FAM171A1 | 1 | 32.601 | 32.601 | 0.000032 |
| FAM171B | 2 | 164.7457 | 31.4169 | 0.001124 |
| FAM172A | 1 | 50.2655 | 50.2655 | 0.000246 |
| FAM177A1 | 8 | 255.353 | 56.1851 | 0.000725 |
| FAM20A | 3 | 176.4557 | 81.2096 | 0.001151 |
| FAM20B | 2 | 62.2367 | 30.6634 | 0.000636 |
| FAM234B | 5 | 107.059 | 34.732 | 0.000125 |
| FAM3B | 10 | 309.5208 | 30.8693 | 0.000734 |
| FAM3D | 3 | 340.2837 | 34.3979 | 0.001571 |
| FAP | 5 | 169.4836 | 44.7572 | 0.000189 |
| FAS | 7 | 256.2973 | 34.8638 | 0.002809 |
| FASN | 1 | 335.3487 | 335.3487 | 0.004544 |
| FBLN1 | 3 | 139.7776 | 48.5233 | 0.001213 |
| FBLN5 | 2 | 57.9615 | 32.6346 | 0.000541 |
| FBP1 | 2 | 83.9798 | 29.7698 | 0.000455 |
| FBP2 | 2 | 148.2781 | 47.3284 | 0.001036 |
| FCER2 | 6 | 337.2949 | 35.7575 | 0.003813 |
| FCGR2A | 12 | 778.7143 | 82.718 | 0.002863 |
| FCGR2B | 11 | 978.1498 | 40.7685 | 0.003171 |
| FCGR3A | 9 | 1819.8187 | 60.1626 | 0.020693 |
| FCGR3B | 9 | 202.5346 | 30.8072 | 0.000786 |
| FCMR | 1 | 188.7423 | 188.7423 | 0.001442 |
| FCN1 | 9 | 245.3435 | 29.8961 | 0.002668 |
| FCN2 | 14 | 393.5835 | 30.5828 | 0.002584 |
| FCN3 | 7 | 250.5244 | 30.2544 | 0.000209 |
| FCRL1 | 3 | 357.1712 | 48.4525 | 0.004639 |
| FCRL3 | 9 | 245.8524 | 34.7898 | 0.002019 |
| FCRL4 | 8 | 438.6853 | 38.2009 | 0.002681 |
| FCRL6 | 1 | 210.1596 | 210.1596 | 0.00175 |
| FCRLB | 4 | 641.1762 | 112.321 | 0.004948 |
| FER | 1 | 81.9736 | 81.9736 | 0.001094 |
| FETUB | 7 | 153.3414 | 30.6755 | 0.000372 |
| FGF2 | 6 | 647.8602 | 51.157 | 0.005849 |
| FGF23 | 1 | 39.5956 | 39.5956 | 0.000523 |
| FGFBP1 | 1 | 78.6204 | 78.6204 | 0.000405 |
| FGFBP3 | 3 | 395.1652 | 40.3709 | 0.004432 |
| FGFR1 | 2 | 80.4864 | 34.6908 | 0.001008 |
| FGFR3 | 4 | 144.2928 | 31.0219 | 0.001317 |
| FGG | 1 | 240.6162 | 240.6162 | 0.001767 |
| FGL1 | 7 | 578.0169 | 30.6111 | 0.003271 |
| FGL2 | 1 | 42.7092 | 42.7092 | 0.000332 |
| FGR | 2 | 167.8813 | 60.8725 | 0.000528 |
| FH | 1 | 287.0796 | 287.0796 | 0.003385 |
| FHIT | 3 | 62.3573 | 44.4925 | 0.000807 |
| FIS1 | 1 | 363.6007 | 363.6007 | 0.00114 |
| FJX1 | 4 | 210.8543 | 58.9658 | 0.002624 |
| FKBP1B | 2 | 365.1267 | 55.9192 | 0.003463 |
| FKBP2 | 1 | 36.7497 | 36.7497 | 0.000166 |
| FKBP4 | 2 | 71.4013 | 50.2814 | 0.000182 |
| FKBP7 | 5 | 276.4648 | 33.2116 | 0.00232 |
| FLII | 1 | 91.6629 | 91.6629 | 0.000123 |
| FLRT2 | 6 | 224.7551 | 40.4549 | 0.002325 |
| FLRT3 | 10 | 839.9342 | 48.2169 | 0.002809 |
| FLT1 | 1 | 32.8086 | 32.8086 | 0.000225 |
| FLT4 | 3 | 111.162 | 36.0491 | 0.000804 |
| FMOD | 3 | 111.7951 | 38.7718 | 0.000442 |
| FN1 | 3 | 398.9973 | 362.9233 | 0.00494 |
| FOLH1 | 1 | 279.8356 | 279.8356 | 0.000562 |
| FOLR2 | 1 | 77.2796 | 77.2796 | 0.00009 |
| FOLR3 | 6 | 1240.2375 | 43.5222 | 0.006813 |
| FOXO3 | 1 | 37.3547 | 37.3547 | 0.000312 |
| FRZB | 6 | 462.6554 | 37.965 | 0.001755 |
| FSTL1 | 2 | 200.1665 | 85.1294 | 0.002582 |
| FSTL3 | 1 | 75.7124 | 75.7124 | 0.000598 |
| FSTL4 | 2 | 42.1949 | 39.0244 | 0.000335 |
| FTCD | 4 | 802.044 | 36.0093 | 0.002066 |
| FTL | 1 | 34.1931 | 34.1931 | 0.00009 |
| FUT10 | 7 | 824.2819 | 34.3401 | 0.008578 |
| FUT3 | 9 | 416.7701 | 49.7448 | 0.002239 |
| FUT5 | 9 | 564.862 | 35.4343 | 0.002196 |
| FUT8 | 13 | 532.8443 | 36.8657 | 0.000756 |
| G3BP1 | 1 | 60.8774 | 60.8774 | 0.000707 |
| GAA | 6 | 266.5567 | 57.2726 | 0.002372 |
| GABARAPL2 | 1 | 112.3571 | 112.3571 | 0.000702 |
| GALNT13 | 1 | 45.8746 | 45.8746 | 0.000122 |
| GALNT16 | 4 | 172.93 | 31.6568 | 0.001966 |
| GALP | 1 | 62.5972 | 62.5972 | 0.000067 |
| GAPDH | 1 | 37.9298 | 37.9298 | 0.000207 |
| GAS1 | 2 | 89.9167 | 78.3518 | 0.001252 |
| GAS6 | 4 | 262.2165 | 42.7078 | 0.003041 |
| GATM | 1 | 385.5387 | 385.5387 | 0.004101 |
| GBP1 | 4 | 207.1428 | 68.4441 | 0.000281 |
| GBP2 | 1 | 87.59 | 87.59 | 0.000787 |
| GC | 2 | 132.8504 | 61.5829 | 0.001741 |
| GCA | 2 | 523.3446 | 31.4524 | 0.002646 |
| GCKR | 1 | 106.483 | 106.483 | 0.001352 |
| GCLM | 2 | 86.3892 | 62.9063 | 0.001038 |
| GDF15 | 5 | 387.6718 | 72.4975 | 0.003081 |
| GDI2 | 1 | 136.8666 | 136.8666 | 0.001747 |
| GFER | 1 | 43.4027 | 43.4027 | 0.000399 |
| GFRA1 | 1 | 463.8358 | 463.8358 | 0.005189 |
| GFRA2 | 8 | 204.4691 | 31.0041 | 0.002105 |
| GFRAL | 3 | 216.4126 | 123.8973 | 0.002265 |
| GFUS | 1 | 56.9071 | 56.9071 | 0.000074 |
| GGH | 5 | 352.0587 | 34.5761 | 0.001716 |
| GGPS1 | 1 | 121.5966 | 121.5966 | 0.000799 |
| GHR | 3 | 188.3921 | 37.7777 | 0.001799 |
| GIP | 1 | 32.2623 | 32.2623 | 0.000359 |
| GKN2 | 6 | 617.4979 | 36.7812 | 0.001522 |
| GLB1 | 1 | 32.8904 | 32.8904 | 0.000446 |
| GLCE | 8 | 241.8533 | 31.984 | 0.002233 |
| GLIPR1 | 1 | 112.6808 | 112.6808 | 0.001525 |
| GLIPR2 | 3 | 351.242 | 39.6307 | 0.003748 |
| GLO1 | 3 | 66.2206 | 32.1036 | 0.00037 |
| GLRX | 1 | 86.5999 | 86.5999 | 0.000933 |
| GLRX2 | 3 | 449.7666 | 87.5664 | 0.000782 |
| GLRX3 | 1 | 91.1472 | 91.1472 | 0.001254 |
| GLTPD2 | 4 | 231.4754 | 38.9754 | 0.002345 |
| GLUL | 1 | 39.5359 | 39.5359 | 0.000535 |
| GM2A | 3 | 381.4703 | 60.5526 | 0.002908 |
| GMDS | 1 | 38.4708 | 38.4708 | 0.000349 |
| GMPR | 9 | 1619.5539 | 37.2551 | 0.011879 |
| GMPR2 | 4 | 238.219 | 32.1978 | 0.000773 |
| GNLY | 7 | 307.2632 | 68.0925 | 0.003404 |
| GNMT | 2 | 411.5726 | 88.8437 | 0.00488 |
| GNPDA1 | 2 | 158.1388 | 40.9596 | 0.001211 |
| GNPNAT1 | 1 | 63.3067 | 63.3067 | 0.000337 |
| GNPTG | 4 | 342.2109 | 43.5687 | 0.00135 |
| GNRH2 | 2 | 215.1969 | 51.183 | 0.001856 |
| GNS | 1 | 31.318 | 31.318 | 0.000434 |
| GOLM1 | 6 | 248.9552 | 79.1178 | 0.001194 |
| GOLM2 | 1 | 34.6764 | 34.6764 | 0.000023 |
| GP1BA | 4 | 117.8637 | 42.6128 | 0.00042 |
| GP5 | 2 | 93.425 | 37.2491 | 0.000794 |
| GP6 | 4 | 289.7127 | 31.0387 | 0.001942 |
| GPC1 | 6 | 281.8572 | 51.6264 | 0.000707 |
| GPC5 | 7 | 315.0346 | 35.0677 | 0.00288 |
| GPC6 | 1 | 47.7087 | 47.7087 | 0.000488 |
| GPCPD1 | 2 | 69.839 | 68.1704 | 0.00094 |
| GPD1 | 1 | 30.0409 | 30.0409 | 0.000023 |
| GPN1 | 1 | 65.9689 | 65.9689 | 0.000632 |
| GPNMB | 11 | 332.7495 | 34.4844 | 0.001618 |
| GPT | 1 | 36.9475 | 36.9475 | 0.000521 |
| GPX1 | 1 | 36.0733 | 36.0733 | 0.000023 |
| GPX7 | 9 | 318.376 | 42.598 | 0.000449 |
| GRAMD1C | 12 | 229.1742 | 36.4428 | 0.001916 |
| GRAP | 1 | 36.5764 | 36.5764 | 0.000144 |
| GRAP2 | 1 | 64.1541 | 64.1541 | 0.000166 |
| GREM1 | 8 | 740.2794 | 32.2132 | 0.005321 |
| GREM2 | 1 | 44.5764 | 44.5764 | 0.000089 |
| GRHPR | 3 | 346.7207 | 44.7937 | 0.004025 |
| GRN | 4 | 163.9936 | 37.3472 | 0.001515 |
| GSN | 8 | 167.3494 | 57.9515 | 0.00058 |
| GSR | 2 | 102.5499 | 31.5755 | 0.001115 |
| GSS | 1 | 422.9361 | 422.9361 | 0.005767 |
| GSTA1 | 5 | 228.3668 | 38.7574 | 0.002681 |
| GSTM1 | 12 | 525.3301 | 30.4608 | 0.001734 |
| GSTM3 | 10 | 1016.4302 | 72.5325 | 0.005977 |
| GSTM4 | 10 | 857.1633 | 31.7041 | 0.002684 |
| GSTO1 | 6 | 922.2916 | 74.7593 | 0.009951 |
| GSTP1 | 2 | 140.9864 | 30.7553 | 0.001979 |
| GSTT2B | 4 | 284.1416 | 37.3656 | 0.00352 |
| GSTZ1 | 9 | 1001.4196 | 200.7526 | 0.006193 |
| GUCA2B | 2 | 100.5678 | 50.6777 | 0.000414 |
| GUK1 | 4 | 179.182 | 42.5247 | 0.000489 |
| GUSB | 2 | 242.2296 | 196.1714 | 0.002218 |
| GXYLT1 | 7 | 241.6531 | 29.7496 | 0.001608 |
| GZMA | 5 | 204.264 | 74.9561 | 0.000391 |
| GZMB | 1 | 99.1724 | 99.1724 | 0.000343 |
| GZMK | 2 | 170.9963 | 31.3815 | 0.002287 |
| GZMM | 1 | 47.9542 | 47.9542 | 0.00016 |
| H1-10 | 1 | 33.6759 | 33.6759 | 0.000325 |
| H6PD | 8 | 256.4331 | 30.3032 | 0.003019 |
| HABP4 | 3 | 514.4264 | 38.2391 | 0.004628 |
| HADH | 1 | 74.5384 | 74.5384 | 0.000256 |
| HAGH | 2 | 180.1019 | 33.9846 | 0.001122 |
| HAPLN1 | 3 | 113.3538 | 65.0514 | 0.001047 |
| HAPLN4 | 1 | 106.1293 | 106.1293 | 0.000776 |
| HAVCR1 | 4 | 382.5794 | 32.5379 | 0.003842 |
| HAVCR2 | 5 | 287.1311 | 35.5472 | 0.001955 |
| HBEGF | 1 | 35.5772 | 35.5772 | 0.000495 |
| HBQ1 | 1 | 100.9603 | 100.9603 | 0.000895 |
| HBZ | 5 | 385.0267 | 57.0103 | 0.003233 |
| HDGF | 2 | 74.6744 | 73.9907 | 0.000873 |
| HDGFL3 | 1 | 124.4287 | 124.4287 | 0.000423 |
| HDHD2 | 2 | 465.7911 | 141.5164 | 0.001469 |
| HDHD3 | 1 | 449.3294 | 449.3294 | 0.005892 |
| HEBP1 | 5 | 1060.2132 | 77.8925 | 0.003051 |
| HEXB | 4 | 255.8002 | 29.9715 | 0.002685 |
| HEXIM1 | 1 | 99.6751 | 99.6751 | 0.001191 |
| HEXIM2 | 1 | 107.2703 | 107.2703 | 0.001257 |
| HGD | 2 | 112.9304 | 49.4882 | 0.001057 |
| HGF | 1 | 158.4973 | 158.4973 | 0.00147 |
| HGFAC | 7 | 1609.5051 | 77.6259 | 0.017482 |
| HHIP | 2 | 179.073 | 45.2441 | 0.00114 |
| HIBCH | 4 | 272.8815 | 37.266 | 0.003409 |
| HINT1 | 1 | 99.2155 | 99.2155 | 0.000959 |
| HK2 | 2 | 65.6153 | 51.1566 | 0.000361 |
| HLA-DQA2 | 5 | 355.2732 | 65.9378 | 0.003587 |
| HMBS | 1 | 42.6361 | 42.6361 | 0.000372 |
| HMGCS2 | 1 | 44.8022 | 44.8022 | 0.000621 |
| HMOX1 | 4 | 46.3563 | 33.3517 | 0.00015 |
| HNRNPAB | 3 | 47.0624 | 33.3543 | 0.000119 |
| HOMER2 | 1 | 66.5548 | 66.5548 | 0.000517 |
| HP | 15 | 603.6557 | 38.0928 | 0.004363 |
| HPCAL1 | 1 | 233.9171 | 233.9171 | 0.001885 |
| HPGDS | 11 | 218.574 | 31.7251 | 0.000402 |
| HPSE | 2 | 134.2012 | 82.2699 | 0.000928 |
| HRG | 7 | 2369.5279 | 35.3324 | 0.013258 |
| HS3ST3B1 | 1 | 35.7193 | 35.7193 | 0.000489 |
| HS6ST1 | 2 | 197.607 | 43.6713 | 0.002718 |
| HS6ST3 | 1 | 133.032 | 133.032 | 0.001812 |
| HSD17B14 | 2 | 62.665 | 44.9069 | 0.000375 |
| HSF1 | 1 | 62.1695 | 62.1695 | 0.0009 |
| HSP90B1 | 7 | 1039.2752 | 33.1021 | 0.00758 |
| HSPA13 | 1 | 124.2204 | 124.2204 | 0.001227 |
| HSPA1A | 4 | 79.0103 | 33.1088 | 0.000756 |
| HSPA1B | 1 | 49.2081 | 49.2081 | 0.00059 |
| HSPA1L | 4 | 117.2874 | 30.4418 | 0.000703 |
| HSPB1 | 8 | 221.5977 | 31.3026 | 0.002162 |
| HSPG2 | 5 | 224.0505 | 36.8118 | 0.00066 |
| HTATIP2 | 8 | 229.8003 | 42.7934 | 0.002332 |
| HTN3 | 3 | 140.7311 | 31.9483 | 0.000245 |
| HTRA1 | 2 | 73.3708 | 36.1041 | 0.000739 |
| HYAL1 | 2 | 102.39 | 45.2616 | 0.000221 |
| IBSP | 1 | 134.815 | 134.815 | 0.001901 |
| ICAM1 | 8 | 1382.1333 | 32.0691 | 0.009987 |
| ICAM4 | 2 | 127.97 | 94.3962 | 0.001184 |
| ICAM5 | 14 | 873.1558 | 43.4157 | 0.005463 |
| ICOSLG | 1 | 75.1835 | 75.1835 | 0.000807 |
| IDH1 | 3 | 222.6429 | 53.9416 | 0.00056 |
| IDI1 | 1 | 42.7772 | 42.7772 | 0.000156 |
| IDI2 | 2 | 173.6111 | 34.1324 | 0.002421 |
| IDO1 | 1 | 47.9036 | 47.9036 | 0.000588 |
| IDUA | 5 | 756.605 | 33.877 | 0.008996 |
| IER3 | 1 | 82.6881 | 82.6881 | 0.000173 |
| IFI16 | 2 | 59.7361 | 40.7604 | 0.000496 |
| IFIT3 | 1 | 101.4028 | 101.4028 | 0.001113 |
| IFNAR1 | 7 | 902.006 | 75.8835 | 0.003501 |
| IFNGR1 | 2 | 45.7063 | 31.709 | 0.000317 |
| IFNL3 | 1 | 35.8687 | 35.8687 | 0.000303 |
| IFNLR1 | 3 | 208.7574 | 32.055 | 0.000499 |
| IGDCC4 | 7 | 324.6269 | 34.3981 | 0.000643 |
| IGF1R | 2 | 105.2915 | 38.2226 | 0.000805 |
| IGF2R | 7 | 269.6981 | 33.7194 | 0.001065 |
| IGFALS | 6 | 120.4058 | 35.6184 | 0.000234 |
| IGFBP1 | 2 | 65.1922 | 41.228 | 0.00073 |
| IGFBP2 | 2 | 35.1142 | 33.7335 | 0.000219 |
| IGFBP3 | 4 | 357.2633 | 54.1166 | 0.001193 |
| IGFBP4 | 1 | 47.489 | 47.489 | 0.000665 |
| IGFBP5 | 1 | 40.0273 | 40.0273 | 0.000566 |
| IGFBP6 | 1 | 62.4584 | 62.4584 | 0.000339 |
| IGFBP7 | 4 | 373.1455 | 150.608 | 0.003107 |
| IGFLR1 | 5 | 359.5524 | 69.5784 | 0.002297 |
| IGLL1 | 6 | 390.348 | 32.2528 | 0.001855 |
| IGLON5 | 2 | 81.3198 | 36.6739 | 0.000194 |
| IGSF3 | 4 | 69.329 | 32.9071 | 0.000615 |
| IGSF8 | 1 | 247.9457 | 247.9457 | 0.002064 |
| IHH | 2 | 40.2309 | 36.3021 | 0.000102 |
| IL10RB | 1 | 75.4332 | 75.4332 | 0.001047 |
| IL11RA | 4 | 371.8191 | 36.9989 | 0.001253 |
| IL12B | 6 | 385.2945 | 30.9605 | 0.00111 |
| IL12RB1 | 1 | 84.7106 | 84.7106 | 0.001015 |
| IL15RA | 7 | 305.8129 | 44.6263 | 0.002324 |
| IL16 | 9 | 507.8145 | 39.6603 | 0.000853 |
| IL17B | 1 | 59.4358 | 59.4358 | 0.000607 |
| IL17RA | 9 | 1034.801 | 37.7289 | 0.011519 |
| IL17RD | 7 | 231.7115 | 33.9755 | 0.00199 |
| IL18R1 | 8 | 673.2306 | 59.8965 | 0.004424 |
| IL18RAP | 1 | 91.627 | 91.627 | 0.001137 |
| IL1R1 | 3 | 189.385 | 32.4303 | 0.002259 |
| IL1R2 | 6 | 300.9126 | 34.9327 | 0.003726 |
| IL1RAP | 7 | 2015.8295 | 33.1291 | 0.017485 |
| IL1RL1 | 10 | 801.1618 | 32.2464 | 0.005831 |
| IL1RL2 | 3 | 150.2126 | 36.6967 | 0.001827 |
| IL1RN | 3 | 252.2357 | 44.3953 | 0.003208 |
| IL20RA | 1 | 47.3286 | 47.3286 | 0.00052 |
| IL22 | 1 | 49.98 | 49.98 | 0.00014 |
| IL22RA2 | 6 | 76.8464 | 30.9922 | 0.00007 |
| IL27RA | 9 | 637.9143 | 35.1965 | 0.004099 |
| IL2RA | 1 | 66.9094 | 66.9094 | 0.00066 |
| IL2RB | 1 | 138.9065 | 138.9065 | 0.001955 |
| IL5RA | 7 | 342.1669 | 33.0378 | 0.004054 |
| IL6R | 11 | 417.5942 | 32.9426 | 0.001738 |
| IL6ST | 4 | 267.0276 | 62.4518 | 0.001386 |
| IL7R | 1 | 89.9687 | 89.9687 | 0.001148 |
| IL9 | 1 | 95.3499 | 95.3499 | 0.001103 |
| INHBA | 2 | 103.3281 | 102.5613 | 0.001126 |
| INHBB | 4 | 306.0923 | 32.2427 | 0.003768 |
| INHBC | 10 | 583.8124 | 117.6609 | 0.001791 |
| INPP5B | 2 | 322.4134 | 35.9533 | 0.002084 |
| INSL5 | 1 | 50.2269 | 50.2269 | 0.000703 |
| INSR | 1 | 65.1503 | 65.1503 | 0.000825 |
| IRAG1 | 2 | 117.593 | 61.3734 | 0.001151 |
| IRAK4 | 1 | 51.2775 | 51.2775 | 0.000125 |
| IRF2 | 1 | 34.6809 | 34.6809 | 0.000248 |
| IRF3 | 1 | 73.8129 | 73.8129 | 0.000987 |
| ISG15 | 4 | 368.9868 | 34.4132 | 0.004042 |
| ISLR2 | 4 | 179.7587 | 34.486 | 0.001448 |
| ISOC1 | 3 | 159.2706 | 44.5601 | 0.001969 |
| ITGA2 | 1 | 122.89 | 122.89 | 0.001498 |
| ITIH1 | 8 | 399.6738 | 51.2018 | 0.004001 |
| ITIH2 | 6 | 275.0281 | 83.5913 | 0.001379 |
| ITIH3 | 8 | 622.9081 | 31.8013 | 0.002329 |
| ITIH4 | 1 | 97.2204 | 97.2204 | 0.000438 |
| ITIH5 | 8 | 307.8694 | 39.7285 | 0.003189 |
| ITLN1 | 3 | 60.5664 | 41.1789 | 0.000059 |
| ITPA | 12 | 752.5168 | 32.5192 | 0.001248 |
| ITPKA | 1 | 75.198 | 75.198 | 0.000999 |
| IVD | 2 | 133.2945 | 85.8017 | 0.001704 |
| JAG1 | 1 | 65.3034 | 65.3034 | 0.000827 |
| JUND | 1 | 51.5972 | 51.5972 | 0.000662 |
| KCNAB2 | 1 | 69.789 | 69.789 | 0.000666 |
| KDR | 3 | 516.4753 | 61.2217 | 0.001243 |
| KIAA1549L | 4 | 314.7728 | 38.6484 | 0.004118 |
| KIR2DL3 | 9 | 3372.5507 | 56.897 | 0.0306 |
| KIR2DL4 | 5 | 303.5268 | 36.8422 | 0.003563 |
| KIRREL2 | 6 | 491.836 | 77.3295 | 0.001001 |
| KIT | 1 | 30.7075 | 30.7075 | 0.000434 |
| KL | 4 | 125.8491 | 31.6312 | 0.000668 |
| KLB | 9 | 699.3001 | 31.0345 | 0.006518 |
| KLC1 | 1 | 104.7873 | 104.7873 | 0.001355 |
| KLK10 | 8 | 1300.4515 | 48.0254 | 0.013649 |
| KLK11 | 6 | 2168.6789 | 36.2969 | 0.007913 |
| KLK12 | 1 | 281.2056 | 281.2056 | 0.003855 |
| KLK13 | 4 | 1000.7607 | 43.8678 | 0.011664 |
| KLK14 | 5 | 243.1378 | 42.1339 | 0.002134 |
| KLK3 | 2 | 35.32 | 29.9236 | 0.000374 |
| KLK7 | 4 | 292.8856 | 29.7637 | 0.001525 |
| KLK8 | 6 | 299.989 | 45.4798 | 0.000368 |
| KLKB1 | 6 | 269.5507 | 30.8785 | 0.003111 |
| KLRB1 | 2 | 41.1687 | 34.0217 | 0.000103 |
| KNG1 | 12 | 403.5688 | 32.1487 | 0.002086 |
| KPNA2 | 1 | 56.4598 | 56.4598 | 0.00024 |
| KPNA6 | 1 | 55.6238 | 55.6238 | 0.000085 |
| KREMEN1 | 3 | 192.9169 | 51.6426 | 0.001228 |
| KRT1 | 2 | 73.9709 | 72.2034 | 0.000473 |
| KRT20 | 2 | 40.9377 | 32.0672 | 0.000544 |
| KRT5 | 2 | 151.8054 | 29.9623 | 0.001494 |
| KYAT3 | 5 | 254.6353 | 32.1057 | 0.003141 |
| KYNU | 5 | 463.2732 | 31.793 | 0.003192 |
| L1CAM | 1 | 29.7259 | 29.7259 | 0.000039 |
| LACRT | 1 | 41.0694 | 41.0694 | 0.00058 |
| LAG3 | 2 | 140.7992 | 52.1722 | 0.001545 |
| LAMC2 | 7 | 233.0268 | 36.6289 | 0.002041 |
| LANCL1 | 1 | 130.8852 | 130.8852 | 0.000107 |
| LAP3 | 10 | 63.6937 | 32.6442 | 0.000065 |
| LARGE1 | 2 | 103.4086 | 31.4579 | 0.001266 |
| LAYN | 1 | 39.4933 | 39.4933 | 0.000524 |
| LBP | 7 | 599.0788 | 32.9155 | 0.001548 |
| LCN1 | 1 | 69.0509 | 69.0509 | 0.000502 |
| LCN2 | 1 | 52.2404 | 52.2404 | 0.000112 |
| LCP1 | 4 | 101.175 | 30.2976 | 0.000576 |
| LCT | 7 | 833.5891 | 82.3123 | 0.004619 |
| LDHA | 1 | 99.516 | 99.516 | 0.000151 |
| LDHB | 2 | 61.6524 | 37.299 | 0.000139 |
| LDHC | 1 | 32.8896 | 32.8896 | 0.000183 |
| LDLRAP1 | 2 | 79.0721 | 33.0044 | 0.000329 |
| LEAP2 | 4 | 293.5767 | 47.8166 | 0.002008 |
| LECT2 | 9 | 492.4467 | 38.487 | 0.00198 |
| LEFTY2 | 12 | 825.453 | 29.7207 | 0.008683 |
| LEPR | 9 | 3030.5412 | 62.435 | 0.027249 |
| LGALS2 | 3 | 285.4208 | 33.0353 | 0.003891 |
| LGALS3 | 4 | 611.023 | 30.0192 | 0.002778 |
| LGALS3BP | 2 | 205.5769 | 47.6151 | 0.001845 |
| LGALS4 | 1 | 43.6089 | 43.6089 | 0.000615 |
| LGALS9 | 1 | 205.9152 | 205.9152 | 0.00209 |
| LGALSL | 1 | 71.045 | 71.045 | 0.000177 |
| LGMN | 3 | 138.4106 | 39.8045 | 0.000528 |
| LGR4 | 2 | 95.8857 | 36.3912 | 0.001085 |
| LGR5 | 1 | 50.3414 | 50.3414 | 0.000116 |
| LHB | 4 | 348.5842 | 34.5546 | 0.002016 |
| LIFR | 4 | 97.8231 | 30.4784 | 0.001233 |
| LILRA2 | 7 | 757.147 | 53.3915 | 0.001504 |
| LILRA4 | 7 | 230.7445 | 30.0817 | 0.002126 |
| LILRA5 | 10 | 437.7857 | 35.0732 | 0.004518 |
| LILRA6 | 12 | 1938.7884 | 32.3841 | 0.003606 |
| LILRB1 | 7 | 537.5526 | 39.6296 | 0.003281 |
| LILRB2 | 7 | 1312.8162 | 49.0521 | 0.014045 |
| LILRB3 | 10 | 724.9582 | 74.3768 | 0.003176 |
| LILRB5 | 9 | 990.936 | 57.9569 | 0.01114 |
| LIMA1 | 1 | 55.2718 | 55.2718 | 0.000762 |
| LINGO1 | 2 | 63.62 | 32.1927 | 0.000794 |
| LIPN | 10 | 299.2444 | 36.0879 | 0.002254 |
| LMAN2 | 1 | 125.6305 | 125.6305 | 0.00167 |
| LMAN2L | 1 | 170.0956 | 170.0956 | 0.002115 |
| LOXL3 | 1 | 160.9655 | 160.9655 | 0.000506 |
| LPO | 3 | 330.235 | 34.9068 | 0.003402 |
| LRIG1 | 8 | 897.1334 | 32.1002 | 0.007542 |
| LRIG3 | 6 | 534.0133 | 55.7341 | 0.002773 |
| LRP10 | 2 | 73.2354 | 43.1018 | 0.000148 |
| LRP11 | 17 | 429.1281 | 45.6295 | 0.004191 |
| LRP12 | 2 | 37.0103 | 35.3937 | 0.000431 |
| LRP4 | 3 | 493.2322 | 72.4198 | 0.005295 |
| LRP8 | 2 | 271.6925 | 86.764 | 0.003617 |
| LRPAP1 | 4 | 147.4869 | 32.2213 | 0.000138 |
| LRRC15 | 4 | 286.0676 | 36.8386 | 0.003429 |
| LRRC32 | 1 | 55.7149 | 55.7149 | 0.000618 |
| LRRC4B | 2 | 60.0261 | 40.9969 | 0.000331 |
| LRRC4C | 4 | 133.5848 | 30.0643 | 0.001483 |
| LRRTM2 | 1 | 87.1498 | 87.1498 | 0.00098 |
| LRRTM4 | 1 | 38.1265 | 38.1265 | 0.000464 |
| LSAMP | 4 | 123.2125 | 32.5615 | 0.00062 |
| LTA | 1 | 30.6162 | 30.6162 | 0.000064 |
| LTBP4 | 1 | 59.229 | 59.229 | 0.000053 |
| LTF | 3 | 287.8576 | 99.0308 | 0.000333 |
| LUM | 7 | 139.0938 | 36.1321 | 0.000177 |
| LY6G6D | 1 | 34.1738 | 34.1738 | 0.000464 |
| LY75 | 14 | 563.2404 | 213.4553 | 0.00097 |
| LY9 | 5 | 388.0654 | 48.0693 | 0.003939 |
| LYPD3 | 1 | 197.4282 | 197.4282 | 0.001835 |
| LYPLAL1 | 1 | 159.5636 | 159.5636 | 0.001045 |
| LYVE1 | 6 | 138.8759 | 49.1023 | 0.000357 |
| LYZ | 6 | 568.2701 | 33.989 | 0.006587 |
| LZIC | 1 | 39.3138 | 39.3138 | 0.000049 |
| MAGI2 | 8 | 248.8872 | 48.6164 | 0.001323 |
| MAN1A2 | 4 | 186.2315 | 32.812 | 0.00098 |
| MAN1C1 | 3 | 219.0603 | 36.5844 | 0.00289 |
| MAN2B2 | 9 | 419.4374 | 30.2926 | 0.004536 |
| MANBA | 6 | 332.0903 | 36.6385 | 0.003399 |
| MANEA | 5 | 4034.5787 | 227.819 | 0.040545 |
| MANF | 1 | 53.1577 | 53.1577 | 0.000346 |
| MANSC1 | 3 | 272.7655 | 31.1312 | 0.001375 |
| MANSC4 | 7 | 283.421 | 36.1741 | 0.002085 |
| MAP1LC3A | 1 | 36.9181 | 36.9181 | 0.000521 |
| MAP2K1 | 1 | 47.4255 | 47.4255 | 0.000163 |
| MAP2K3 | 1 | 31.7102 | 31.7102 | 0.000393 |
| MAP3K3 | 1 | 35.7723 | 35.7723 | 0.000415 |
| MAPK12 | 2 | 401.6529 | 107.9115 | 0.005358 |
| MAPK13 | 1 | 156.3426 | 156.3426 | 0.001631 |
| MAPK3 | 3 | 311.3252 | 38.0564 | 0.003916 |
| MAPK8 | 1 | 40.1854 | 40.1854 | 0.00047 |
| MAPK9 | 2 | 203.9215 | 68.9909 | 0.001556 |
| MAPKAPK2 | 1 | 376.9881 | 376.9881 | 0.004219 |
| MAPRE1 | 1 | 57.1789 | 57.1789 | 0.000693 |
| MAPRE2 | 1 | 329.5517 | 329.5517 | 0.004607 |
| MARK3 | 1 | 40.6783 | 40.6783 | 0.000466 |
| MASP1 | 1 | 99.2231 | 99.2231 | 0.001344 |
| MATN2 | 4 | 103.2714 | 41.636 | 0.000616 |
| MATN3 | 10 | 580.4937 | 30.5268 | 0.005136 |
| MATN4 | 4 | 223.5594 | 38.4671 | 0.002027 |
| MAX | 1 | 480.8477 | 480.8477 | 0.006455 |
| MBL2 | 10 | 908.8187 | 32.579 | 0.007679 |
| MCEE | 1 | 65.283 | 65.283 | 0.000533 |
| MCEMP1 | 1 | 45.618 | 45.618 | 0.000471 |
| MCF2L | 2 | 360.2905 | 45.3569 | 0.005013 |
| MCL1 | 1 | 186.2649 | 186.2649 | 0.000156 |
| MDGA1 | 8 | 441.3134 | 68.1151 | 0.003089 |
| MDGA2 | 11 | 965.3671 | 33.8113 | 0.003165 |
| MDH1 | 1 | 77.3012 | 77.3012 | 0.000928 |
| MDK | 2 | 86.9065 | 50.8943 | 0.000162 |
| MESD | 1 | 31.5094 | 31.5094 | 0.000416 |
| MET | 4 | 92.0463 | 34.4881 | 0.0009 |
| METAP1 | 1 | 61.6035 | 61.6035 | 0.000826 |
| METTL24 | 4 | 96.6184 | 30.516 | 0.000211 |
| MFAP2 | 3 | 309.3331 | 43.7507 | 0.003942 |
| MFAP4 | 4 | 173.1757 | 31.1179 | 0.000239 |
| MFGE8 | 4 | 276.5053 | 54.0278 | 0.003179 |
| MFNG | 1 | 341.4965 | 341.4965 | 0.00048 |
| MGAT1 | 1 | 48.8276 | 48.8276 | 0.000529 |
| MGAT2 | 1 | 265.2002 | 265.2002 | 0.003701 |
| MGAT4B | 6 | 237.9138 | 42.3431 | 0.00062 |
| MGAT4C | 1 | 41.1317 | 41.1317 | 0.000174 |
| MGP | 3 | 318.4059 | 36.9742 | 0.003985 |
| MIA | 9 | 647.9504 | 41.5427 | 0.001215 |
| MICA | 7 | 1589.2138 | 341.0856 | 0.007176 |
| MICB | 7 | 1195.7143 | 44.5029 | 0.006459 |
| MIF | 1 | 75.0644 | 75.0644 | 0.00105 |
| MINPP1 | 1 | 133.616 | 133.616 | 0.001858 |
| MLN | 7 | 368.634 | 38.2591 | 0.00311 |
| MMAB | 5 | 311.3035 | 59.0775 | 0.002733 |
| MMP1 | 8 | 349.5032 | 63.3725 | 0.003395 |
| MMP10 | 6 | 271.296 | 31.5075 | 0.002361 |
| MMP12 | 6 | 565.5896 | 44.5797 | 0.002595 |
| MMP13 | 1 | 45.367 | 45.367 | 0.000479 |
| MMP16 | 1 | 57.2915 | 57.2915 | 0.000601 |
| MMP19 | 3 | 60.6948 | 30.6351 | 0.000284 |
| MMP2 | 2 | 87.3964 | 50.6499 | 0.00097 |
| MMP7 | 3 | 476.2232 | 95.3032 | 0.001988 |
| MMP8 | 3 | 286.6014 | 31.2905 | 0.000464 |
| MMP9 | 1 | 68.8204 | 68.8204 | 0.000173 |
| MPG | 1 | 94.9485 | 94.9485 | 0.000104 |
| MPO | 6 | 318.4276 | 42.4508 | 0.000676 |
| MPPED2 | 2 | 133.4127 | 30.585 | 0.001154 |
| MPST | 2 | 94.7573 | 35.8674 | 0.000227 |
| MRC1 | 9 | 408.2309 | 33.2679 | 0.003288 |
| MRC2 | 4 | 227.2416 | 43.2567 | 0.001046 |
| MSMB | 6 | 2373.9377 | 35.2611 | 0.024681 |
| MSMP | 1 | 55.0756 | 55.0756 | 0.000758 |
| MSR1 | 5 | 175.4113 | 48.7467 | 0.000904 |
| MST1 | 12 | 2203.2588 | 36.1294 | 0.004833 |
| MTHFD1 | 3 | 80.873 | 39.5918 | 0.00079 |
| MTHFD2 | 2 | 72.0174 | 70.1952 | 0.000057 |
| MTHFS | 5 | 328.2395 | 51.4083 | 0.002324 |
| MTHFSD | 5 | 461.0188 | 30.7748 | 0.005867 |
| MTRF1L | 1 | 404.3141 | 404.3141 | 0.003804 |
| MUC16 | 2 | 184.9809 | 30.7369 | 0.000855 |
| MUSK | 1 | 65.1066 | 65.1066 | 0.00088 |
| MVD | 1 | 60.7941 | 60.7941 | 0.000061 |
| MX1 | 4 | 580.3615 | 48.1255 | 0.007541 |
| MXRA7 | 4 | 320.7993 | 35.9116 | 0.004107 |
| MXRA8 | 1 | 94.5399 | 94.5399 | 0.00008 |
| MYBPC1 | 1 | 85.7619 | 85.7619 | 0.00063 |
| MYOC | 6 | 244.2499 | 41.8205 | 0.000872 |
| MYOM2 | 3 | 46.2488 | 30.182 | 0.000058 |
| MYORG | 1 | 225.0622 | 225.0622 | 0.003009 |
| MYZAP | 1 | 76.7993 | 76.7993 | 0.000982 |
| MZB1 | 3 | 111.1976 | 31.0339 | 0.000259 |
| NAAA | 9 | 405.0035 | 37.6979 | 0.001468 |
| NADK | 1 | 233.7061 | 233.7061 | 0.003266 |
| NAGK | 5 | 121.103 | 30.4044 | 0.001497 |
| NAGLU | 12 | 522.6952 | 38.5267 | 0.000544 |
| NAGPA | 7 | 244.809 | 36.0811 | 0.00152 |
| NANS | 1 | 120.8941 | 120.8941 | 0.001271 |
| NAP1L4 | 1 | 297.6695 | 297.6695 | 0.0026 |
| NAPG | 1 | 79.0417 | 79.0417 | 0.001116 |
| NAXE | 1 | 356.2618 | 356.2618 | 0.000384 |
| NBL1 | 2 | 39.2703 | 37.3884 | 0.000448 |
| NCAM1 | 4 | 404.3696 | 35.9457 | 0.003521 |
| NCAM2 | 6 | 805.7743 | 54.091 | 0.008424 |
| NCAN | 2 | 235.2474 | 47.8809 | 0.000855 |
| NCF1 | 7 | 258.8438 | 39.0705 | 0.00167 |
| NCR1 | 4 | 346.2004 | 34.4079 | 0.001901 |
| NCR3 | 4 | 120.2258 | 37.3131 | 0.000504 |
| NDE1 | 1 | 67.8649 | 67.8649 | 0.000659 |
| NDRG3 | 2 | 100.6002 | 81.0852 | 0.000116 |
| NDST1 | 2 | 153.7792 | 49.3166 | 0.002143 |
| NECTIN2 | 1 | 33.8702 | 33.8702 | 0.000113 |
| NECTIN4 | 1 | 53.3836 | 53.3836 | 0.000404 |
| NEGR1 | 3 | 166.5342 | 30.9797 | 0.002302 |
| NEK7 | 1 | 46.3163 | 46.3163 | 0.000026 |
| NELL1 | 7 | 269.464 | 36.8834 | 0.001025 |
| NEO1 | 3 | 170.5776 | 34.3212 | 0.002057 |
| NETO1 | 2 | 37.3325 | 31.7248 | 0.00033 |
| NEU1 | 1 | 36.4537 | 36.4537 | 0.0004 |
| NFASC | 4 | 470.1561 | 56.9407 | 0.002174 |
| NFKB1 | 1 | 62.5486 | 62.5486 | 0.000806 |
| NHEJ1 | 3 | 95.6576 | 74.0831 | 0.000109 |
| NID1 | 5 | 110.0801 | 30.5589 | 0.00029 |
| NID2 | 6 | 487.3056 | 46.5615 | 0.004583 |
| NIT2 | 2 | 79.3915 | 44.9686 | 0.000641 |
| NLGN1 | 3 | 101.7151 | 41.3396 | 0.000899 |
| NLGN2 | 2 | 136.3115 | 50.0647 | 0.000662 |
| NMB | 2 | 180.4941 | 89.0117 | 0.001963 |
| NME2 | 1 | 282.1754 | 282.1754 | 0.000598 |
| NME4 | 3 | 164.6699 | 31.2718 | 0.002082 |
| NMRAL1 | 11 | 429.6669 | 51.7137 | 0.00082 |
| NMRK1 | 2 | 194.3969 | 33.4813 | 0.002389 |
| NMT1 | 1 | 31.8137 | 31.8137 | 0.000432 |
| NMT2 | 1 | 55.0282 | 55.0282 | 0.000491 |
| NNMT | 1 | 49.0619 | 49.0619 | 0.000136 |
| NOG | 4 | 364.7898 | 36.0508 | 0.000291 |
| NOTCH1 | 2 | 91.9843 | 64.0409 | 0.000772 |
| NOTCH3 | 1 | 78.8775 | 78.8775 | 0.000496 |
| NOTUM | 3 | 108.8048 | 34.8318 | 0.000477 |
| NPDC1 | 1 | 45.4417 | 45.4417 | 0.000234 |
| NPL | 3 | 112.4267 | 31.5962 | 0.00015 |
| NPNT | 3 | 185.2146 | 42.0702 | 0.001859 |
| NPPA | 1 | 48.0303 | 48.0303 | 0.000119 |
| NPPB | 6 | 232.035 | 31.968 | 0.002941 |
| NPTX1 | 8 | 375.1353 | 34.0061 | 0.002164 |
| NPTX2 | 2 | 108.0255 | 44.0307 | 0.001034 |
| NPTXR | 7 | 477.3161 | 104.9712 | 0.00049 |
| NPW | 5 | 926.1844 | 46.1661 | 0.007141 |
| NQO1 | 6 | 374.5192 | 36.0928 | 0.00457 |
| NQO2 | 10 | 867.8796 | 49.9422 | 0.003681 |
| NRBP1 | 1 | 30.5255 | 30.5255 | 0.000292 |
| NRCAM | 1 | 48.4761 | 48.4761 | 0.000482 |
| NRP1 | 4 | 301.8119 | 38.7655 | 0.002821 |
| NRP2 | 5 | 87.8247 | 34.2337 | 0.000703 |
| NRXN3 | 7 | 173.1176 | 34.2307 | 0.002096 |
| NSF | 1 | 230.1314 | 230.1314 | 0.003215 |
| NSFL1C | 1 | 34.7991 | 34.7991 | 0.000459 |
| NT5C | 4 | 298.214 | 37.1654 | 0.000868 |
| NT5C2 | 2 | 108.3398 | 36.3829 | 0.00118 |
| NT5C3A | 1 | 91.7625 | 91.7625 | 0.00104 |
| NT5C3B | 11 | 362.2849 | 33.669 | 0.001449 |
| NT5DC3 | 3 | 266.2214 | 37.5395 | 0.002169 |
| NT5E | 4 | 796.0191 | 68.5895 | 0.005106 |
| NT5M | 1 | 225.569 | 225.569 | 0.000519 |
| NTF3 | 3 | 86.1935 | 57.8429 | 0.000559 |
| NTM | 13 | 466.3797 | 29.9902 | 0.005792 |
| NTN1 | 5 | 625.2727 | 31.8552 | 0.005304 |
| NTN4 | 3 | 194.9401 | 52.2563 | 0.001594 |
| NTNG1 | 11 | 503.7875 | 29.9208 | 0.000885 |
| NTRK2 | 1 | 55.9552 | 55.9552 | 0.000658 |
| NTRK3 | 5 | 138.4454 | 30.4879 | 0.001111 |
| NUCB1 | 2 | 141.2934 | 31.309 | 0.00161 |
| NUDCD3 | 1 | 74.1746 | 74.1746 | 0.000833 |
| NUDT12 | 4 | 750.815 | 37.0863 | 0.005218 |
| NUDT2 | 5 | 261.7308 | 61.0892 | 0.00219 |
| NUDT5 | 1 | 78.7234 | 78.7234 | 0.0011 |
| NUDT9 | 2 | 104.1894 | 48.5946 | 0.000683 |
| OAF | 5 | 388.7195 | 29.9357 | 0.003208 |
| OBP2B | 4 | 294.0808 | 29.8357 | 0.002461 |
| OGN | 5 | 295.795 | 71.0221 | 0.002801 |
| OLA1 | 1 | 275.2004 | 275.2004 | 0.002423 |
| OLFM1 | 3 | 118.258 | 46.7443 | 0.000815 |
| OLFM2 | 6 | 664.9096 | 71.9876 | 0.007032 |
| OLFML3 | 2 | 69.6254 | 34.4729 | 0.000749 |
| OLR1 | 2 | 91.9109 | 32.1033 | 0.000325 |
| OMD | 1 | 45.6974 | 45.6974 | 0.000168 |
| OMG | 1 | 116.8723 | 116.8723 | 0.000912 |
| OPCML | 3 | 75.9968 | 30.8732 | 0.000844 |
| OSMR | 2 | 110.1246 | 30.3381 | 0.001425 |
| OVCA2 | 1 | 59.281 | 59.281 | 0.000056 |
| OXT | 5 | 507.8391 | 34.1125 | 0.006318 |
| P4HB | 2 | 138.3135 | 43.7687 | 0.00177 |
| PAICS | 1 | 79.0699 | 79.0699 | 0.000144 |
| PAK4 | 1 | 30.1275 | 30.1275 | 0.000382 |
| PAM | 8 | 474.4166 | 30.5454 | 0.001865 |
| PARK7 | 2 | 117.0027 | 45.3844 | 0.001338 |
| PARP1 | 2 | 36.2522 | 35.4162 | 0.000288 |
| PARVA | 2 | 72.2684 | 41.4413 | 0.000456 |
| PATE4 | 1 | 196.2237 | 196.2237 | 0.002087 |
| PAWR | 1 | 34.4188 | 34.4188 | 0.000455 |
| PCBD1 | 6 | 80.4431 | 43.066 | 0.000629 |
| PCBD2 | 1 | 42.7617 | 42.7617 | 0.000035 |
| PCDH10 | 2 | 214.3195 | 149.0187 | 0.002915 |
| PCDH9 | 5 | 231.1328 | 34.7185 | 0.001832 |
| PCNP | 1 | 100.437 | 100.437 | 0.001418 |
| PCOLCE | 2 | 194.8119 | 37.0667 | 0.002396 |
| PCOLCE2 | 7 | 397.0715 | 42.5177 | 0.002229 |
| PCSK1 | 11 | 623.5446 | 54.5627 | 0.002772 |
| PCSK2 | 1 | 104.8529 | 104.8529 | 0.00148 |
| PCSK7 | 11 | 371.6392 | 31.0834 | 0.002774 |
| PCSK9 | 5 | 229.9532 | 34.1115 | 0.00105 |
| PCYOX1 | 5 | 362.7025 | 54.0279 | 0.004249 |
| PDCD1LG2 | 6 | 229.3479 | 32.047 | 0.002114 |
| PDCD5 | 5 | 287.3182 | 31.8245 | 0.002725 |
| PDCD6 | 4 | 70.5983 | 30.4019 | 0.000161 |
| PDCD6IP | 1 | 152.2093 | 152.2093 | 0.001675 |
| PDE4A | 4 | 194.1147 | 34.6944 | 0.000223 |
| PDE5A | 6 | 195.0172 | 30.6039 | 0.002384 |
| PDGFA | 3 | 39.2981 | 31.9377 | 0.000047 |
| PDGFD | 10 | 332.901 | 30.4273 | 0.003182 |
| PDGFRA | 3 | 82.1222 | 34.8988 | 0.000203 |
| PDGFRB | 9 | 1814.7683 | 60.906 | 0.01459 |
| PDGFRL | 7 | 343.6314 | 31.3895 | 0.001098 |
| PDHX | 2 | 127.2071 | 100.4888 | 0.000301 |
| PDIA5 | 8 | 1221.4054 | 39.19 | 0.013445 |
| PDK1 | 3 | 167.1366 | 30.1229 | 0.001589 |
| PDLIM1 | 1 | 57.0578 | 57.0578 | 0.000175 |
| PDLIM4 | 1 | 294.465 | 294.465 | 0.001136 |
| PDXK | 6 | 78.4112 | 29.9975 | 0.000672 |
| PEAR1 | 4 | 155.408 | 38.7011 | 0.001682 |
| PEBP1 | 7 | 402.6033 | 31.421 | 0.001031 |
| PECR | 1 | 140.0604 | 140.0604 | 0.000737 |
| PELO | 1 | 32.6843 | 32.6843 | 0.000151 |
| PENK | 7 | 293.9249 | 34.45 | 0.002335 |
| PEX14 | 1 | 40.5399 | 40.5399 | 0.000572 |
| PF4 | 2 | 74.2853 | 72.9778 | 0.000174 |
| PF4V1 | 3 | 491.5071 | 29.8527 | 0.005239 |
| PFKM | 1 | 404.3174 | 404.3174 | 0.003551 |
| PGD | 1 | 74.9916 | 74.9916 | 0.000102 |
| PGLS | 3 | 120.0313 | 91.5903 | 0.000502 |
| PGLYRP1 | 3 | 186.6945 | 32.2488 | 0.002072 |
| PGLYRP2 | 4 | 305.6601 | 38.225 | 0.002317 |
| PGLYRP3 | 1 | 41.5866 | 41.5866 | 0.000048 |
| PGM1 | 2 | 77.7758 | 30.2571 | 0.000657 |
| PGM2 | 5 | 65.3947 | 33.5034 | 0.000098 |
| PGP | 4 | 139.0884 | 37.628 | 0.000267 |
| PGRMC1 | 1 | 39.3239 | 39.3239 | 0.000027 |
| PHPT1 | 2 | 277.2473 | 32.0895 | 0.002845 |
| PI3 | 3 | 364.6376 | 38.0948 | 0.003108 |
| PIANP | 2 | 490.5574 | 444.7674 | 0.006582 |
| PIGR | 1 | 287.0318 | 287.0318 | 0.003873 |
| PIK3CG | 1 | 35.0931 | 35.0931 | 0.000492 |
| PILRA | 21 | 1528.7176 | 74.0077 | 0.007027 |
| PIP | 5 | 996.5526 | 42.5957 | 0.00626 |
| PIP4K2A | 1 | 195.681 | 195.681 | 0.002244 |
| PKDCC | 2 | 54.6257 | 35.7914 | 0.000445 |
| PKLR | 2 | 137.7779 | 29.8497 | 0.000524 |
| PKM | 2 | 67.7901 | 51.5193 | 0.000044 |
| PKP2 | 2 | 96.448 | 34.5277 | 0.00026 |
| PLA2G12B | 2 | 75.2152 | 31.8448 | 0.000408 |
| PLA2G2A | 6 | 452.2395 | 37.4435 | 0.003938 |
| PLA2G7 | 6 | 72.5984 | 32.5378 | 0.000124 |
| PLA2R1 | 7 | 497.7278 | 69.601 | 0.004228 |
| PLAAT2 | 1 | 39.3424 | 39.3424 | 0.000493 |
| PLAT | 4 | 202.9781 | 34.7515 | 0.000474 |
| PLAU | 5 | 323.2187 | 49.2965 | 0.002434 |
| PLAUR | 3 | 233.0393 | 46.8974 | 0.001667 |
| PLCG1 | 1 | 70.0325 | 70.0325 | 0.000986 |
| PLCG2 | 2 | 128.9526 | 66.1585 | 0.000522 |
| PLD3 | 1 | 47.4968 | 47.4968 | 0.000111 |
| PLEK | 2 | 142.467 | 80.4083 | 0.00149 |
| PLEKHA1 | 3 | 343.7959 | 31.889 | 0.004387 |
| PLEKHA7 | 4 | 321.8462 | 35.7049 | 0.001902 |
| PLG | 10 | 208.6641 | 32.3205 | 0.000787 |
| PLOD2 | 1 | 100.0924 | 100.0924 | 0.001409 |
| PLOD3 | 4 | 64.0365 | 30.0362 | 0.000108 |
| PLTP | 9 | 242.5084 | 35.4173 | 0.001257 |
| PLXNA1 | 3 | 301.8724 | 34.3268 | 0.00337 |
| PLXNA4 | 1 | 94.146 | 94.146 | 0.000804 |
| PLXNB2 | 6 | 368.2999 | 33.6058 | 0.004 |
| PLXNC1 | 10 | 902.4605 | 49.4251 | 0.000932 |
| PLXND1 | 3 | 291.1459 | 96.095 | 0.003588 |
| PMEL | 2 | 450.0441 | 32.0192 | 0.002199 |
| PMM1 | 1 | 32.223 | 32.223 | 0.000237 |
| PMM2 | 4 | 126.7547 | 30.3389 | 0.000799 |
| PMVK | 3 | 77.5091 | 38.5766 | 0.000207 |
| PNKP | 1 | 153.8637 | 153.8637 | 0.002159 |
| PNLIP | 2 | 55.4376 | 45.057 | 0.000052 |
| PNLIPRP1 | 2 | 195.4727 | 77.7121 | 0.002354 |
| PNLIPRP2 | 9 | 1288.8032 | 44.8445 | 0.009312 |
| PNP | 2 | 157.8381 | 68.5802 | 0.001302 |
| POFUT1 | 5 | 290.3605 | 33.6999 | 0.000709 |
| POGLUT1 | 3 | 245.8299 | 45.1671 | 0.001003 |
| POGLUT3 | 5 | 309.0633 | 38.7621 | 0.000352 |
| POLI | 1 | 73.3869 | 73.3869 | 0.00007 |
| POLM | 3 | 156.4639 | 74.6835 | 0.000326 |
| POMC | 3 | 69.4694 | 54.1215 | 0.000058 |
| POMGNT2 | 4 | 293.6721 | 30.0948 | 0.003547 |
| POR | 2 | 189.3812 | 60.0798 | 0.001551 |
| POSTN | 4 | 205.15 | 73.443 | 0.002427 |
| PPA1 | 2 | 267.0225 | 69.0321 | 0.003315 |
| PPA2 | 1 | 134.8849 | 134.8849 | 0.001483 |
| PPCS | 1 | 147.7968 | 147.7968 | 0.001917 |
| PPIC | 8 | 208.6463 | 30.3718 | 0.001695 |
| PPID | 2 | 460.0369 | 79.2922 | 0.004646 |
| PPIE | 3 | 432.8527 | 36.5615 | 0.005599 |
| PPIH | 2 | 39.2475 | 39.0425 | 0.000038 |
| PPIL1 | 8 | 266.319 | 31.7397 | 0.000389 |
| PPP1R14A | 2 | 255.3498 | 40.8602 | 0.002515 |
| PPP1R1A | 1 | 39.1282 | 39.1282 | 0.000337 |
| PPP2R5A | 1 | 49.063 | 49.063 | 0.00037 |
| PPT1 | 2 | 287.7053 | 254.7784 | 0.002269 |
| PRCP | 3 | 167.3878 | 35.9237 | 0.001052 |
| PRDX1 | 3 | 89.2799 | 47.0226 | 0.000136 |
| PRDX6 | 1 | 115.0771 | 115.0771 | 0.000818 |
| PREP | 3 | 137.9589 | 29.929 | 0.000802 |
| PRG3 | 2 | 64.0754 | 31.9127 | 0.000602 |
| PRKCA | 2 | 63.379 | 35.9747 | 0.00085 |
| PRKCB | 1 | 72.4758 | 72.4758 | 0.000723 |
| PRKCSH | 1 | 136.3241 | 136.3241 | 0.001296 |
| PROC | 3 | 129.3627 | 31.4934 | 0.001467 |
| PROK2 | 6 | 833.6868 | 33.5512 | 0.005491 |
| PROS1 | 1 | 62.2089 | 62.2089 | 0.000096 |
| PRPSAP1 | 1 | 96.7231 | 96.7231 | 0.000917 |
| PRPSAP2 | 1 | 51.9822 | 51.9822 | 0.000725 |
| PRSS1 | 1 | 58.6364 | 58.6364 | 0.00021 |
| PRSS2 | 5 | 175.5517 | 48.0867 | 0.00174 |
| PRSS22 | 4 | 207.3039 | 32.098 | 0.0022 |
| PRSS27 | 3 | 185.3901 | 32.7163 | 0.000929 |
| PRSS3 | 7 | 284.4472 | 70.6361 | 0.000944 |
| PRSS57 | 7 | 216.7139 | 38.4316 | 0.002249 |
| PRSS8 | 2 | 60.7446 | 43.6005 | 0.000308 |
| PRTN3 | 5 | 349.3002 | 64.8831 | 0.004056 |
| PRXL2A | 1 | 138.8931 | 138.8931 | 0.001934 |
| PSAP | 4 | 319.2824 | 32.7944 | 0.003752 |
| PSAPL1 | 8 | 383.5151 | 34.317 | 0.003024 |
| PSAT1 | 2 | 131.6704 | 31.2521 | 0.001338 |
| PSG3 | 6 | 970.6014 | 115.6636 | 0.008304 |
| PSG4 | 8 | 377.3853 | 32.3018 | 0.001833 |
| PSG5 | 6 | 510.493 | 44.5479 | 0.00458 |
| PSG7 | 1 | 167.0073 | 167.0073 | 0.001169 |
| PSG9 | 3 | 224.5898 | 45.939 | 0.00176 |
| PSMB1 | 2 | 486.881 | 52.5048 | 0.006482 |
| PSMB4 | 3 | 376.8657 | 31.1155 | 0.003144 |
| PSMB9 | 1 | 32.9582 | 32.9582 | 0.000241 |
| PSMD9 | 1 | 214.3868 | 214.3868 | 0.002993 |
| PSME1 | 1 | 41.18 | 41.18 | 0.000437 |
| PSME2 | 3 | 113.935 | 78.5853 | 0.000463 |
| PTEN | 1 | 39.7592 | 39.7592 | 0.000083 |
| PTGDS | 1 | 298.3417 | 298.3417 | 0.004214 |
| PTGES2 | 1 | 88.133 | 88.133 | 0.000743 |
| PTGFRN | 9 | 383.2163 | 57.3752 | 0.001309 |
| PTGR1 | 12 | 332.1676 | 59.2468 | 0.000537 |
| PTGR3 | 1 | 137.0036 | 137.0036 | 0.001893 |
| PTHLH | 3 | 96.7445 | 42.5807 | 0.001117 |
| PTK7 | 2 | 76.6113 | 47.912 | 0.000787 |
| PTN | 3 | 228.8605 | 32.5177 | 0.002667 |
| PTPN7 | 1 | 41.3766 | 41.3766 | 0.000289 |
| PTPN9 | 1 | 63.4745 | 63.4745 | 0.000714 |
| PTPRJ | 2 | 95.0057 | 70.0851 | 0.000187 |
| PTPRS | 1 | 143.7947 | 143.7947 | 0.000525 |
| PTPRU | 5 | 90.5596 | 30.5311 | 0.00064 |
| PXDN | 3 | 112.9351 | 35.5696 | 0.001239 |
| PYGL | 2 | 119.0052 | 52.7837 | 0.000705 |
| PYY | 2 | 57.7373 | 31.6927 | 0.000474 |
| PZP | 7 | 82.6118 | 44.8093 | 0.000171 |
| QDPR | 4 | 768.8227 | 32.5544 | 0.008202 |
| QPCT | 5 | 181.346 | 32.5297 | 0.00153 |
| QPCTL | 6 | 263.5137 | 44.6928 | 0.00198 |
| QSOX2 | 5 | 270.1408 | 41.5749 | 0.00332 |
| RAB1A | 1 | 41.9726 | 41.9726 | 0.000425 |
| RAB21 | 1 | 107.6044 | 107.6044 | 0.000096 |
| RAB22A | 1 | 60.1928 | 60.1928 | 0.000787 |
| RAB31 | 3 | 92.2666 | 33.8871 | 0.000909 |
| RAB6B | 1 | 610.2691 | 610.2691 | 0.004974 |
| RAD23B | 1 | 41.6809 | 41.6809 | 0.000391 |
| RAD51D | 1 | 35.6375 | 35.6375 | 0.000258 |
| RALB | 1 | 769.6747 | 769.6747 | 0.009052 |
| RAP1GDS1 | 1 | 32.6927 | 32.6927 | 0.00033 |
| RARRES1 | 9 | 1620.307 | 39.8869 | 0.010546 |
| RARRES2 | 4 | 207.7623 | 30.7963 | 0.002121 |
| RBM17 | 2 | 287.8955 | 38.3869 | 0.000659 |
| RBP1 | 1 | 85.0773 | 85.0773 | 0.000786 |
| RBP4 | 1 | 99.5746 | 99.5746 | 0.001292 |
| RBP5 | 1 | 37.6488 | 37.6488 | 0.000077 |
| RBP7 | 1 | 178.116 | 178.116 | 0.00172 |
| RCAN1 | 1 | 52.2936 | 52.2936 | 0.000053 |
| RCN1 | 1 | 226.1066 | 226.1066 | 0.001449 |
| RECQL | 7 | 384.3047 | 34.0961 | 0.00047 |
| REG1A | 5 | 338.6265 | 118.2489 | 0.001152 |
| REG1B | 7 | 251.6087 | 32.0718 | 0.000752 |
| REG3A | 5 | 173.5315 | 40.1054 | 0.000404 |
| REG3G | 8 | 539.1638 | 31.6372 | 0.004043 |
| REG4 | 5 | 83.6659 | 32.8756 | 0.000463 |
| RELT | 1 | 46.0286 | 46.0286 | 0.000534 |
| REN | 4 | 77.3276 | 32.0932 | 0.000207 |
| RET | 4 | 393.5813 | 37.8502 | 0.003858 |
| RETN | 5 | 351.8074 | 40.9289 | 0.000688 |
| REXO2 | 1 | 162.947 | 162.947 | 0.001008 |
| RFESD | 1 | 57.0087 | 57.0087 | 0.000115 |
| RFK | 2 | 123.5887 | 52.8251 | 0.001222 |
| RGMA | 4 | 130.5556 | 31.644 | 0.001595 |
| RGMB | 3 | 140.7309 | 56.2432 | 0.001767 |
| RGS18 | 1 | 46.7677 | 46.7677 | 0.000655 |
| RHOC | 1 | 148.9527 | 148.9527 | 0.002102 |
| RIDA | 3 | 349.0821 | 38.247 | 0.004277 |
| RIGI | 2 | 261.9963 | 104.3022 | 0.003061 |
| RIPK2 | 1 | 51.0607 | 51.0607 | 0.000333 |
| RMDN1 | 4 | 300.2524 | 36.1846 | 0.003139 |
| RNASE1 | 6 | 160.2178 | 30.0964 | 0.001655 |
| RNASE2 | 1 | 333.3919 | 333.3919 | 0.004675 |
| RNASE3 | 6 | 209.4277 | 34.3264 | 0.001746 |
| RNASE4 | 4 | 378.6746 | 57.5395 | 0.003626 |
| RNASE6 | 7 | 832.0525 | 46.0724 | 0.00827 |
| RNASET2 | 5 | 668.4135 | 37.1424 | 0.004267 |
| RNPEP | 4 | 370.0993 | 50.8716 | 0.004154 |
| ROBO1 | 6 | 143.3163 | 45.0911 | 0.001277 |
| ROBO2 | 3 | 48.0503 | 33.3884 | 0.000162 |
| ROR1 | 3 | 300.7357 | 54.1124 | 0.002237 |
| ROR2 | 3 | 176.2452 | 65.4411 | 0.001847 |
| RPE | 1 | 87.5745 | 87.5745 | 0.001215 |
| RPIA | 2 | 205.9139 | 151.5921 | 0.00079 |
| RPN1 | 1 | 350.8716 | 350.8716 | 0.004812 |
| RPS6KA1 | 1 | 156.7748 | 156.7748 | 0.002192 |
| RRM1 | 1 | 45.9555 | 45.9555 | 0.000639 |
| RRM2B | 2 | 191.6858 | 59.1424 | 0.000946 |
| RSPO1 | 4 | 146.4269 | 29.9144 | 0.000325 |
| RSPO3 | 4 | 436.809 | 84.7456 | 0.005901 |
| RSPO4 | 3 | 79.6056 | 44.6755 | 0.000188 |
| RTN4IP1 | 1 | 66.0543 | 66.0543 | 0.000739 |
| RTN4R | 5 | 378.2419 | 49.7985 | 0.004335 |
| RTP4 | 5 | 269.2481 | 37.3044 | 0.003429 |
| S100A12 | 3 | 231.6845 | 64.0886 | 0.002106 |
| S100A14 | 1 | 119.9981 | 119.9981 | 0.001661 |
| S100A16 | 3 | 220.4127 | 40.1193 | 0.002542 |
| S100A2 | 2 | 115.3539 | 113.8286 | 0.000169 |
| S100A4 | 2 | 81.2121 | 45.8349 | 0.00017 |
| S100A6 | 4 | 87.8898 | 37.0116 | 0.000151 |
| S100A7 | 5 | 1638.2714 | 41.8777 | 0.007911 |
| S100A9 | 1 | 32.7732 | 32.7732 | 0.000355 |
| SAA1 | 6 | 374.1407 | 37.6344 | 0.003151 |
| SAA2 | 4 | 618.7625 | 75.3901 | 0.002881 |
| SAA4 | 8 | 1047.6441 | 47.0104 | 0.006897 |
| SAR1A | 2 | 180.1884 | 33.9084 | 0.00223 |
| SARS2 | 1 | 177.9634 | 177.9634 | 0.002313 |
| SAT2 | 4 | 203.4982 | 44.1519 | 0.002277 |
| SBDS | 1 | 191.8433 | 191.8433 | 0.000354 |
| SCARA5 | 6 | 227.2973 | 35.6929 | 0.002182 |
| SCARF1 | 4 | 384.4883 | 43.6514 | 0.004669 |
| SCARF2 | 1 | 248.6202 | 248.6202 | 0.00238 |
| SCG3 | 7 | 423.8723 | 31.6285 | 0.003004 |
| SCGB3A1 | 3 | 127.156 | 32.0564 | 0.001154 |
| SCGN | 2 | 53.4499 | 32.2642 | 0.000511 |
| SCIN | 1 | 123.6329 | 123.6329 | 0.001734 |
| SCO2 | 1 | 133.0837 | 133.0837 | 0.000609 |
| SCUBE1 | 4 | 92.4148 | 39.6352 | 0.000984 |
| SCUBE3 | 3 | 214.4905 | 33.2683 | 0.001521 |
| SDCBP2 | 1 | 31.3451 | 31.3451 | 0.000377 |
| SDF2 | 3 | 316.079 | 30.9355 | 0.004286 |
| SDF2L1 | 1 | 40.2435 | 40.2435 | 0.000027 |
| SDSL | 5 | 233.4394 | 38.3853 | 0.000259 |
| SECTM1 | 4 | 161.723 | 30.2901 | 0.002114 |
| SELE | 1 | 179.8814 | 179.8814 | 0.002232 |
| SELENOW | 3 | 132.1416 | 42.4655 | 0.001221 |
| SELL | 5 | 785.69 | 37.7969 | 0.008725 |
| SELP | 3 | 397.7294 | 44.1801 | 0.002287 |
| SELPLG | 2 | 428.0547 | 96.5109 | 0.00422 |
| SEMA3C | 2 | 113.6138 | 58.1051 | 0.001409 |
| SEMA3E | 11 | 799.4139 | 44.4038 | 0.004058 |
| SEMA3G | 4 | 156.1807 | 39.6833 | 0.000707 |
| SEMA4A | 1 | 367.0357 | 367.0357 | 0.004849 |
| SEMA4C | 2 | 311.2362 | 198.8235 | 0.000489 |
| SEMA4D | 9 | 409.4341 | 33.6024 | 0.000787 |
| SEMA5A | 9 | 2528.7114 | 43.3489 | 0.010301 |
| SEMA6A | 3 | 63.9541 | 35.6886 | 0.000441 |
| SEMA6B | 2 | 75.7837 | 29.9224 | 0.000885 |
| SEMA7A | 1 | 92.3944 | 92.3944 | 0.000522 |
| SEPSECS | 1 | 56.8627 | 56.8627 | 0.000113 |
| SEPTIN11 | 1 | 57.1786 | 57.1786 | 0.000803 |
| SERPINA1 | 9 | 288.7896 | 46.9581 | 0.00044 |
| SERPINA10 | 9 | 314.1655 | 33.52 | 0.001958 |
| SERPINA11 | 5 | 194.5693 | 33.2017 | 0.001679 |
| SERPINA12 | 6 | 534.3834 | 44.1055 | 0.004648 |
| SERPINA3 | 8 | 244.0243 | 37.1078 | 0.001822 |
| SERPINA4 | 5 | 668.6149 | 62.9754 | 0.006507 |
| SERPINA5 | 2 | 457.1457 | 237.7216 | 0.003319 |
| SERPINA9 | 4 | 127.485 | 31.7153 | 0.001029 |
| SERPINB1 | 1 | 92.6483 | 92.6483 | 0.001261 |
| SERPINB13 | 3 | 197.3726 | 30.9042 | 0.000415 |
| SERPINB4 | 3 | 127.8068 | 32.9381 | 0.000273 |
| SERPINB5 | 1 | 280.9848 | 280.9848 | 0.0037 |
| SERPINB8 | 3 | 308.4037 | 126.5619 | 0.003718 |
| SERPINC1 | 1 | 48.8911 | 48.8911 | 0.000038 |
| SERPIND1 | 1 | 43.578 | 43.578 | 0.000297 |
| SERPINE1 | 2 | 53.0056 | 38.4554 | 0.00018 |
| SERPINE2 | 7 | 495.7806 | 40.7846 | 0.005604 |
| SERPINF1 | 4 | 285.6855 | 44.8011 | 0.003334 |
| SERPINF2 | 4 | 105.4998 | 31.1569 | 0.000821 |
| SERPING1 | 5 | 423.815 | 51.5055 | 0.001963 |
| SERPINH1 | 2 | 148.5951 | 63.7929 | 0.001803 |
| SEZ6L | 3 | 93.4532 | 78.3008 | 0.000523 |
| SF3B4 | 1 | 37.141 | 37.141 | 0.000166 |
| SFRP1 | 3 | 217.9278 | 127.3815 | 0.002733 |
| SFRP4 | 2 | 362.8488 | 166.6137 | 0.002954 |
| SFTA2 | 1 | 64.9681 | 64.9681 | 0.0003 |
| SFTPB | 6 | 637.9955 | 44.1617 | 0.007973 |
| SFTPD | 7 | 749.2029 | 52.213 | 0.002191 |
| SGK3 | 1 | 64.7687 | 64.7687 | 0.000071 |
| SH3BGRL2 | 1 | 151.521 | 151.521 | 0.002122 |
| SH3BGRL3 | 4 | 318.4483 | 58.8936 | 0.001427 |
| SH3BP2 | 2 | 523.6151 | 31.1016 | 0.007121 |
| SH3GLB2 | 4 | 365.9207 | 30.4984 | 0.004508 |
| SHANK3 | 6 | 476.9558 | 35.5033 | 0.004899 |
| SHBG | 3 | 190.6869 | 42.2853 | 0.002461 |
| SHH | 2 | 78.5858 | 44.2068 | 0.000788 |
| SHMT1 | 5 | 890.0174 | 43.0051 | 0.010632 |
| SIAE | 1 | 196.4615 | 196.4615 | 0.00089 |
| SIGLEC1 | 2 | 36.1036 | 32.5665 | 0.000144 |
| SIGLEC12 | 9 | 362.5666 | 42.5043 | 0.000964 |
| SIGLEC14 | 8 | 440.1575 | 51.2781 | 0.00564 |
| SIGLEC5 | 7 | 1123.5211 | 59.4424 | 0.011487 |
| SIGLEC6 | 8 | 425.0575 | 48.6464 | 0.002952 |
| SIGLEC7 | 4 | 431.4268 | 34.4849 | 0.002852 |
| SIGLEC9 | 10 | 957.357 | 39.3736 | 0.011522 |
| SIRPA | 10 | 1342.8506 | 37.8872 | 0.01049 |
| SIRPB1 | 12 | 778.1511 | 37.3599 | 0.00209 |
| SIRPG | 1 | 311.8613 | 311.8613 | 0.003808 |
| SLAMF6 | 1 | 410.892 | 410.892 | 0.003368 |
| SLAMF7 | 7 | 468.0521 | 33.2305 | 0.00461 |
| SLIT2 | 2 | 95.0805 | 52.1216 | 0.000939 |
| SLITRK1 | 1 | 55.9466 | 55.9466 | 0.00041 |
| SLITRK3 | 4 | 733.9821 | 45.6544 | 0.004011 |
| SLITRK5 | 4 | 131.1193 | 42.9619 | 0.001436 |
| SLITRK6 | 4 | 160.3474 | 36.7917 | 0.001284 |
| SLMAP | 1 | 33.5694 | 33.5694 | 0.000448 |
| SLPI | 1 | 173.985 | 173.985 | 0.002424 |
| SMAD1 | 1 | 36.2178 | 36.2178 | 0.000494 |
| SMAP1 | 4 | 334.1722 | 46.1154 | 0.003015 |
| SMOC1 | 4 | 145.786 | 30.0738 | 0.001074 |
| SMOC2 | 6 | 251.7619 | 32.2749 | 0.002691 |
| SMPD1 | 5 | 690.5168 | 38.7693 | 0.007244 |
| SMPDL3A | 2 | 411.5498 | 31.7688 | 0.003363 |
| SNAP29 | 1 | 135.1261 | 135.1261 | 0.000707 |
| SNCA | 1 | 32.6472 | 32.6472 | 0.000461 |
| SNPH | 2 | 54.5039 | 53.2553 | 0.000402 |
| SNUPN | 1 | 196.242 | 196.242 | 0.001532 |
| SNX1 | 1 | 218.0744 | 218.0744 | 0.000234 |
| SNX8 | 2 | 94.9393 | 45.1897 | 0.000663 |
| SOD3 | 9 | 323.9903 | 30.3915 | 0.001499 |
| SORCS1 | 1 | 61.2742 | 61.2742 | 0.00085 |
| SORD | 5 | 182.4855 | 32.3894 | 0.00131 |
| SPARC | 1 | 30.3952 | 30.3952 | 0.000024 |
| SPARCL1 | 6 | 359.8309 | 35.3088 | 0.003355 |
| SPART | 1 | 35.0135 | 35.0135 | 0.000307 |
| SPATA20 | 4 | 543.2319 | 34.6001 | 0.006857 |
| SPHK1 | 2 | 52.6024 | 47.2678 | 0.000313 |
| SPHK2 | 1 | 59.6066 | 59.6066 | 0.000651 |
| SPINK1 | 1 | 200.2145 | 200.2145 | 0.002689 |
| SPINK2 | 5 | 331.1364 | 50.4744 | 0.001308 |
| SPINK4 | 2 | 333.7523 | 38.1458 | 0.002526 |
| SPINK5 | 2 | 131.2806 | 55.088 | 0.001673 |
| SPINK6 | 8 | 613.1453 | 37.2987 | 0.006278 |
| SPINK7 | 1 | 195.3205 | 195.3205 | 0.002084 |
| SPINT1 | 2 | 236.0877 | 49.2502 | 0.000595 |
| SPINT2 | 7 | 574.7883 | 30.1084 | 0.004178 |
| SPINT3 | 2 | 686.7686 | 101.9362 | 0.009188 |
| SPOCK2 | 2 | 283.6916 | 39.9952 | 0.003885 |
| SPOCK3 | 11 | 448.5307 | 35.2182 | 0.00098 |
| SPON1 | 4 | 340.4239 | 53.0834 | 0.003741 |
| SPON2 | 3 | 394.9735 | 52.9963 | 0.003503 |
| SPP1 | 3 | 54.0737 | 42.4269 | 0.000247 |
| SRA1 | 2 | 118.0275 | 33.29 | 0.00142 |
| SRGN | 4 | 145.1556 | 41.0574 | 0.000976 |
| SRI | 1 | 174.8009 | 174.8009 | 0.00155 |
| SRL | 1 | 202.3588 | 202.3588 | 0.002693 |
| ST13 | 1 | 44.3178 | 44.3178 | 0.000624 |
| ST3GAL1 | 2 | 501.5289 | 54.9661 | 0.006855 |
| ST3GAL6 | 12 | 833.2818 | 29.9427 | 0.001081 |
| ST6GALNAC6 | 3 | 51.5545 | 33.0145 | 0.000107 |
| ST8SIA6 | 1 | 36.7722 | 36.7722 | 0.000072 |
| STAMBP | 2 | 46.4795 | 33.4442 | 0.000031 |
| STAMBPL1 | 2 | 113.4664 | 56.8948 | 0.001577 |
| STARD5 | 3 | 351.2753 | 43.1543 | 0.001975 |
| STAT3 | 1 | 349.9795 | 349.9795 | 0.004769 |
| STAT6 | 5 | 103.6256 | 52.4311 | 0.000157 |
| STC1 | 1 | 84.4779 | 84.4779 | 0.000434 |
| STIM1 | 1 | 124.9049 | 124.9049 | 0.001548 |
| STX7 | 1 | 201.8968 | 201.8968 | 0.002668 |
| STX8 | 1 | 49.2051 | 49.2051 | 0.000464 |
| SUB1 | 1 | 30.0453 | 30.0453 | 0.000196 |
| SULT1A3 | 3 | 122.7805 | 49.6859 | 0.000649 |
| SULT2A1 | 2 | 224.1401 | 53.8372 | 0.001761 |
| SUMO3 | 1 | 48.5571 | 48.5571 | 0.000513 |
| SVEP1 | 16 | 323.7991 | 33.8711 | 0.000958 |
| SWAP70 | 8 | 298.0769 | 43.5333 | 0.001061 |
| SYK | 2 | 112.6 | 110.4106 | 0.000757 |
| SYT11 | 1 | 66.1359 | 66.1359 | 0.00039 |
| TAC1 | 3 | 188.3332 | 97.7 | 0.00124 |
| TAFA5 | 1 | 34.2212 | 34.2212 | 0.000378 |
| TAGLN | 2 | 56.0078 | 52.6433 | 0.000128 |
| TAGLN2 | 2 | 126.659 | 126.6432 | 0.001712 |
| TALDO1 | 3 | 85.866 | 37.9523 | 0.000183 |
| TAPBP | 6 | 656.9765 | 32.929 | 0.003371 |
| TAPBPL | 11 | 891.1746 | 30.178 | 0.006535 |
| TAX1BP3 | 1 | 119.8953 | 119.8953 | 0.001683 |
| TBCB | 1 | 49.565 | 49.565 | 0.000093 |
| TBCE | 2 | 93.8377 | 42.3576 | 0.001245 |
| TCEA2 | 1 | 287.2372 | 287.2372 | 0.003614 |
| TCL1A | 3 | 182.7793 | 30.1424 | 0.00044 |
| TCN1 | 6 | 285.3513 | 37.9553 | 0.001314 |
| TCN2 | 12 | 905.6412 | 41.2157 | 0.007338 |
| TDGF1 | 7 | 1222.4433 | 43.3146 | 0.008885 |
| TEC | 2 | 107.3218 | 34.5084 | 0.001506 |
| TEK | 4 | 161.7231 | 43.2903 | 0.000435 |
| TES | 1 | 63.1319 | 63.1319 | 0.000048 |
| TESC | 5 | 322.4072 | 77.7784 | 0.003126 |
| TF | 1 | 280.8504 | 280.8504 | 0.003122 |
| TFF1 | 3 | 410.4849 | 37.8418 | 0.004292 |
| TFF2 | 2 | 75.1972 | 37.7065 | 0.000697 |
| TFF3 | 4 | 71.2071 | 32.8938 | 0.000262 |
| TFPI | 1 | 38.3221 | 38.3221 | 0.000024 |
| TFPI2 | 1 | 45.3928 | 45.3928 | 0.000158 |
| TFRC | 1 | 74.1373 | 74.1373 | 0.000892 |
| TG | 2 | 62.5161 | 37.6518 | 0.000882 |
| TGFBI | 6 | 225.5631 | 37.0324 | 0.002439 |
| TGFBR3 | 2 | 82.2013 | 50.0526 | 0.000927 |
| TGM2 | 2 | 252.3918 | 29.7195 | 0.003061 |
| TGM3 | 5 | 510.9559 | 37.7219 | 0.005715 |
| TGM4 | 1 | 40.1728 | 40.1728 | 0.00055 |
| THBS1 | 1 | 34.5593 | 34.5593 | 0.000314 |
| THBS2 | 9 | 294.5898 | 54.6522 | 0.00159 |
| THBS3 | 4 | 72.5419 | 35.1729 | 0.000113 |
| THBS4 | 3 | 274.5297 | 100.0238 | 0.001576 |
| THG1L | 4 | 300.6285 | 41.2947 | 0.003912 |
| THSD1 | 5 | 560.2992 | 41.346 | 0.001553 |
| THYN1 | 1 | 41.5995 | 41.5995 | 0.00039 |
| TIE1 | 4 | 201.2506 | 48.0181 | 0.002374 |
| TIGIT | 1 | 83.4074 | 83.4074 | 0.00087 |
| TIMD4 | 4 | 249.2567 | 45.6743 | 0.002862 |
| TIMP2 | 2 | 50.423 | 32.7335 | 0.000565 |
| TIMP3 | 8 | 449.4772 | 36.935 | 0.002498 |
| TIMP4 | 6 | 290.5698 | 44.6357 | 0.002808 |
| TINAGL1 | 1 | 126.4879 | 126.4879 | 0.001784 |
| TIRAP | 3 | 134.5031 | 39.3946 | 0.000242 |
| TLE5 | 1 | 43.0343 | 43.0343 | 0.000599 |
| TLL1 | 1 | 45.9559 | 45.9559 | 0.0006 |
| TLR1 | 1 | 273.0692 | 273.0692 | 0.003493 |
| TLR2 | 1 | 40.3181 | 40.3181 | 0.000031 |
| TLR3 | 8 | 278.9074 | 44.8431 | 0.002123 |
| TMEFF1 | 1 | 42.9129 | 42.9129 | 0.000296 |
| TMEM106A | 1 | 45.8716 | 45.8716 | 0.000546 |
| TMEM106B | 1 | 193.1883 | 193.1883 | 0.002619 |
| TMEM132A | 6 | 303.1699 | 40.4909 | 0.002708 |
| TMEM132B | 2 | 175.3804 | 33.7752 | 0.001932 |
| TMEM132C | 5 | 275.6852 | 32.4026 | 0.003562 |
| TMEM132D | 6 | 294.0031 | 35.4941 | 0.001406 |
| TMEM190 | 10 | 363.0246 | 29.764 | 0.002872 |
| TMEM9 | 1 | 62.5238 | 62.5238 | 0.00079 |
| TNC | 12 | 614.8508 | 35.3556 | 0.002397 |
| TNFAIP3 | 1 | 245.6204 | 245.6204 | 0.000343 |
| TNFAIP6 | 6 | 760.0361 | 42.1112 | 0.008832 |
| TNFAIP8 | 2 | 232.2903 | 49.7775 | 0.00182 |
| TNFRSF11B | 4 | 133.1817 | 37.1164 | 0.00145 |
| TNFRSF17 | 1 | 236.9715 | 236.9715 | 0.003056 |
| TNFRSF19 | 1 | 141.5218 | 141.5218 | 0.001633 |
| TNFRSF1A | 1 | 214.4037 | 214.4037 | 0.000243 |
| TNFRSF1B | 3 | 203.7759 | 54.3219 | 0.000443 |
| TNFRSF21 | 2 | 109.97 | 43.7202 | 0.001343 |
| TNFSF12 | 3 | 405.2465 | 51.9849 | 0.005217 |
| TNFSF13B | 3 | 41.9147 | 33.087 | 0.000251 |
| TNFSF14 | 3 | 105.1437 | 34.9055 | 0.000869 |
| TNFSF15 | 1 | 37.4205 | 37.4205 | 0.000244 |
| TNFSF8 | 2 | 160.9334 | 41.0429 | 0.002229 |
| TNR | 1 | 264.656 | 264.656 | 0.003718 |
| TNXB | 7 | 604.956 | 47.4533 | 0.00378 |
| TP53I3 | 6 | 459.4987 | 34.5489 | 0.002338 |
| TPI1 | 1 | 34.8505 | 34.8505 | 0.000404 |
| TPM4 | 1 | 70.3457 | 70.3457 | 0.000074 |
| TPP1 | 5 | 108.1094 | 31.0918 | 0.000814 |
| TPSAB1 | 9 | 1737.8506 | 62.1576 | 0.003497 |
| TPSB2 | 11 | 1440.5035 | 42.0422 | 0.010573 |
| TPST1 | 3 | 382.8947 | 78.1666 | 0.004155 |
| TPST2 | 2 | 166.5644 | 30.9173 | 0.001964 |
| TRDMT1 | 3 | 352.3203 | 39.0078 | 0.004627 |
| TREM1 | 7 | 262.7526 | 35.6043 | 0.002994 |
| TREM2 | 6 | 342.1928 | 36.432 | 0.000366 |
| TREML1 | 3 | 122.193 | 45.3405 | 0.00011 |
| TREML2 | 7 | 268.6979 | 33.6803 | 0.002505 |
| TRIL | 1 | 68.4612 | 68.4612 | 0.000386 |
| TRIM3 | 2 | 105.0015 | 38.2101 | 0.000845 |
| TRIO | 1 | 31.8134 | 31.8134 | 0.000448 |
| TSG101 | 1 | 296.235 | 296.235 | 0.003672 |
| TSSC4 | 1 | 42.1426 | 42.1426 | 0.000261 |
| TSTD1 | 4 | 293.2996 | 33.4124 | 0.001564 |
| TTL | 1 | 52.1337 | 52.1337 | 0.000394 |
| TWSG1 | 3 | 74.9821 | 38.9155 | 0.000373 |
| TXNDC12 | 1 | 121.1311 | 121.1311 | 0.000553 |
| TXNDC15 | 3 | 883.6102 | 48.8168 | 0.005377 |
| TXNDC5 | 5 | 138.911 | 40.7816 | 0.000391 |
| TXNL4B | 3 | 111.2395 | 30.8747 | 0.000463 |
| TYRO3 | 1 | 157.081 | 157.081 | 0.001983 |
| UAP1 | 1 | 37.5171 | 37.5171 | 0.00022 |
| UBASH3B | 2 | 133.1689 | 49.0312 | 0.001593 |
| UBE2C | 1 | 284.8997 | 284.8997 | 0.003726 |
| UBE2F | 1 | 70.1577 | 70.1577 | 0.000961 |
| UBE2N | 1 | 32.0133 | 32.0133 | 0.00024 |
| UBLCP1 | 4 | 204.154 | 34.7867 | 0.000343 |
| UBXN2B | 1 | 53.5322 | 53.5322 | 0.000708 |
| UCMA | 8 | 225.4413 | 35.2224 | 0.000755 |
| UGDH | 4 | 312.7411 | 38.0219 | 0.003965 |
| UGT1A1 | 2 | 374.945 | 59.2067 | 0.004519 |
| UGT1A6 | 3 | 287.834 | 50.6086 | 0.003146 |
| ULK3 | 1 | 92.8527 | 92.8527 | 0.001001 |
| UNC5B | 4 | 97.2151 | 34.2383 | 0.000718 |
| UNC5C | 3 | 170.4492 | 40.6744 | 0.002044 |
| UNC5D | 2 | 92.131 | 36.2272 | 0.001071 |
| UPP1 | 1 | 105.5785 | 105.5785 | 0.000388 |
| UROD | 3 | 357.414 | 31.948 | 0.004043 |
| UROS | 4 | 159.9588 | 29.8805 | 0.000964 |
| USP15 | 2 | 140.7578 | 66.1725 | 0.000908 |
| USP8 | 1 | 86.9534 | 86.9534 | 0.000665 |
| UST | 3 | 114.8787 | 65.5716 | 0.000855 |
| UXS1 | 1 | 164.5026 | 164.5026 | 0.000898 |
| VARS1 | 3 | 124.4122 | 53.0774 | 0.000694 |
| VASN | 1 | 73.8235 | 73.8235 | 0.000838 |
| VAT1 | 1 | 55.1418 | 55.1418 | 0.000651 |
| VAV1 | 1 | 68.2904 | 68.2904 | 0.000343 |
| VEGFA | 15 | 769.9594 | 37.5964 | 0.009756 |
| VEGFC | 1 | 201.0728 | 201.0728 | 0.000223 |
| VIM | 3 | 53.2332 | 30.1448 | 0.000702 |
| VIT | 5 | 319.3506 | 68.9463 | 0.003135 |
| VNN2 | 8 | 1139.7969 | 43.404 | 0.011993 |
| VOPP1 | 2 | 65.8323 | 35.1227 | 0.000285 |
| VPS26A | 1 | 378.6247 | 378.6247 | 0.003872 |
| VSIR | 6 | 427.7303 | 33.4694 | 0.003583 |
| VTA1 | 1 | 37.9524 | 37.9524 | 0.000535 |
| VTN | 10 | 1080.061 | 116.1455 | 0.00687 |
| VWA1 | 7 | 214.6542 | 34.0015 | 0.000681 |
| VWA2 | 6 | 159.7363 | 68.8971 | 0.000515 |
| VWC2 | 5 | 304.0023 | 30.704 | 0.001616 |
| VWF | 1 | 181.6921 | 181.6921 | 0.002474 |
| WARS1 | 2 | 389.55 | 66.3537 | 0.003963 |
| WBP2 | 1 | 41.5553 | 41.5553 | 0.000468 |
| WFDC1 | 7 | 245.3257 | 41.1266 | 0.001425 |
| WFDC2 | 1 | 50.4846 | 50.4846 | 0.000205 |
| WFDC5 | 1 | 42.8166 | 42.8166 | 0.000482 |
| WFIKKN1 | 2 | 216.3865 | 119.6401 | 0.002099 |
| WFIKKN2 | 6 | 318.2749 | 32.9583 | 0.00301 |
| WIF1 | 1 | 51.9665 | 51.9665 | 0.000722 |
| WWOX | 1 | 74.4043 | 74.4043 | 0.000993 |
| XCL2 | 1 | 57.6445 | 57.6445 | 0.00053 |
| XPNPEP1 | 1 | 55.8389 | 55.8389 | 0.000372 |
| XRCC4 | 1 | 158.0859 | 158.0859 | 0.000943 |
| XXYLT1 | 3 | 281.3566 | 80.4043 | 0.003284 |
| YEATS4 | 1 | 36.12 | 36.12 | 0.00051 |
| YWHAB | 2 | 211.0455 | 30.2948 | 0.002134 |
| ZFAND1 | 3 | 148.5178 | 57.5898 | 0.000984 |
| ZG16B | 1 | 467.701 | 467.701 | 0.005377 |
| ZYX | 1 | 78.3929 | 78.3929 | 0.000918 |

**Supplementary Table 2: The outcome data used in this study.**

| **Outcome** | **GWAS sources** | **Cases** | **Controls** | **Sources** |
| --- | --- | --- | --- | --- |
| erysipelas | FinnGen | 27918 | 439048 | gs://finngen-public-data-r12/summary_stats/release/finngen_R12_AB1_ERYSIPELAS.gz |
|
| cellulitis | FinnGen | 9428 | 470507 | gs://finngen-public-data-r12/summary_stats/release/finngen_R12_L12_CELLULITIS.gz |
|
| Cutaneous abscess, furuncle and carbuncle | FinnGen | 11581 | 470507 | gs://finngen-public-data-r12/summary_stats/release/finngen_R12_L12_ABSCESS_CUT.gz |
|

**Supplementary Table 3: Mendelian randomization analysis results**

| **exposure** | **outcome** | **method** | **Nsnp** | **b** | **se** | **pval** | **pfdr** | **pve** | **OR**  **(95% CI)** | **F statistics** |
| --- | --- | --- | --- | --- | --- | --- | --- | --- | --- | --- |
| CRP | erysipelas | Inverse variance weighted | 2 | 0.226 | 0.052 | 1.63E-05 | 7.86E-05 | 0.011 | 1.25 (1.13, 1.39) | 199.450 |
| FN1 | erysipelas | Inverse variance weighted | 2 | -0.255 | 0.038 | 2.70E-11 | 2.61E-08 | 0.033 | 0.77 (0.72, 0.84) | 399.000 |
| SYK | erysipelas | Inverse variance weighted | 2 | -0.285 | 0.080 | 3.63E-04 | 4.52E-02 | 0.006 | 0.75 (0.64, 0.88) | 112.600 |
| CSK | cellulitis | Wald ratio | 1 | -0.936 | 0.233 | 5.78E-05 | 1.39E-02 | 0.002 | 0.39 (0.25, 0.62) | 55.980 |
| METAP1 | cellulitis | Wald ratio | 1 | -0.811 | 0.229 | 4.05E-04 | 4.54E-02 | 0.002 | 0.44 (0.28, 0.70) | 61.600 |
| ULK3 | cellulitis | Wald ratio | 1 | -0.674 | 0.183 | 2.24E-04 | 4.32E-02 | 0.003 | 0.51 (0.36, 0.73) | 92.850 |
| ARHGAP25 | Cutaneous abscess, furuncle and carbuncle | Wald ratio | 1 | -0.359 | 0.088 | 4.41E-05 | 1.39E-02 | 0.009 | 0.70 (0.59, 0.83) | 339.030 |
| ENTPD6 | Cutaneous abscess, furuncle and carbuncle | Wald ratio | 1 | 0.499 | 0.137 | 2.77E-04 | 4.45E-02 | 0.006 | 1.65 (1.26, 2.16) | 208.950 |
| IGF2R | Cutaneous abscess, furuncle and carbuncle | Inverse variance weighted | 7 | 0.129 | 0.037 | 4.21E-04 | 4.52E-02 | 0.052 | 1.14 (1.06, 1.22) | 269.570 |

**Supplementary Table 4:** Statistical power results for the MR analyses

| **Outcome** | **Exposure (protein)** | **SNP** | **Sample Size** | **α** | **K** | **OR** | **R²** | **POWER** | **F-stat** |
| --- | --- | --- | --- | --- | --- | --- | --- | --- | --- |
| erysipelas | FN1 | rs1250258 | 466,966 | 0.05 | 0.0598 | 0.77 | 0.011 | 1 | 5194.76 |
| erysipelas | FN1 | rs1250259 | 466,966 | 0.05 | 0.0598 | 0.77 | 0.01 | 1 | 4717.83 |
| erysipelas | SYK | rs75505307 | 466,966 | 0.05 | 0.0598 | 0.75 | 0.003 | 1 | 1406.11 |
| erysipelas | SYK | rs72729008 | 466,966 | 0.05 | 0.0598 | 0.75 | 0.004 | 1 | 1876.37 |
| erysipelas | CRP | rs2808628 | 466,966 | 0.05 | 0.0598 | 1.25 | 0.012 | 0.99 | 5672.65 |
| erysipelas | CRP | rs145663198 | 466,966 | 0.05 | 0.0598 | 1.25 | 0.001 | 0.24 | 468.43 |
| cellulitis | CSK | rs4886619 | 470,507 | 0.05 | 0.02 | 0.39 | 0.003 | 0.91 | 1416.77 |
| cellulitis | METAP1 | rs7676259 | 470,507 | 0.05 | 0.02 | 0.44 | 0.003 | 0.85 | 1416.77 |
| cellulitis | ULK3 | rs936228 | 470,507 | 0.05 | 0.02 | 0.51 | 0.004 | 0.85 | 1890.59 |
| Cutaneous abscess, furuncle and carbuncle | ARHGAP25 | rs13413887 | 428,088 | 0.05 | 0.0271 | 0.7 | 0.011 | 0.92 | 4762.34 |
| Cutaneous abscess, furuncle and carbuncle | ENTPD6 | rs6050446 | 428,088 | 0.05 | 0.0271 | 1.65 | 0.007 | 1 | 3018.74 |
| Cutaneous abscess, furuncle and carbuncle | IGF2R | rs13192111 | 428,088 | 0.05 | 0.0271 | 1.14 | 0.05 | 0.91 | 22531.95 |
| Cutaneous abscess, furuncle and carbuncle | IGF2R | rs12202367 | 428,088 | 0.05 | 0.0271 | 1.14 | 0.006 | 0.21 | 2585.03 |
| Cutaneous abscess, furuncle and carbuncle | IGF2R | rs73025574 | 428,088 | 0.05 | 0.0271 | 1.14 | 0.006 | 0.21 | 2585.03 |
| Cutaneous abscess, furuncle and carbuncle | IGF2R | rs184158723 | 428,088 | 0.05 | 0.0271 | 1.14 | 0.003 | 0.13 | 1289.13 |
| Cutaneous abscess, furuncle and carbuncle | IGF2R | rs138962138 | 428,088 | 0.05 | 0.0271 | 1.14 | 0.003 | 0.13 | 1289.13 |
| Cutaneous abscess, furuncle and carbuncle | IGF2R | rs148234538 | 428,088 | 0.05 | 0.0271 | 1.14 | 0.002 | 0.1 | 858.89 |
| Cutaneous abscess, furuncle and carbuncle | IGF2R | rs78737248 | 428,088 | 0.05 | 0.0271 | 1.14 | 0.001 | 0.08 | 429.52 |

**Supplementary Table 5:** reverse MR analysis results

| **outcome** | **exposure** | **method** | **nsnp** | **b** | **se** | **pval** | **lo_ci** | **up_ci** | **or** | **or_lci95** | **or_uci95** |
| --- | --- | --- | --- | --- | --- | --- | --- | --- | --- | --- | --- |
| FN1 | erysipelas | MR Egger | 6 | -0.297 | 0.381 | 0.479 | -1.043 | 0.449 | 0.743 | 0.353 | 1.567 |
| FN1 | erysipelas | Weighted median | 6 | 0.095 | 0.088 | 0.278 | -0.077 | 0.268 | 1.100 | 0.926 | 1.307 |
| FN1 | erysipelas | Inverse variance weighted | 6 | 0.062 | 0.078 | 0.427 | -0.091 | 0.215 | 1.064 | 0.913 | 1.239 |
| FN1 | erysipelas | Simple mode | 6 | 0.073 | 0.111 | 0.539 | -0.145 | 0.291 | 1.076 | 0.865 | 1.337 |
| FN1 | erysipelas | Weighted mode | 6 | 0.073 | 0.100 | 0.496 | -0.122 | 0.269 | 1.076 | 0.885 | 1.308 |
| CPR | erysipelas | MR Egger | 4 | 0.179 | 0.336 | 0.647 | -0.479 | 0.837 | 1.196 | 0.619 | 2.309 |
| CPR | erysipelas | Weighted median | 4 | 0.198 | 0.096 | 0.039 | 0.010 | 0.387 | 1.219 | 1.010 | 1.473 |
| CPR | erysipelas | Inverse variance weighted | 4 | 0.176 | 0.082 | 0.032 | 0.016 | 0.336 | 1.192 | 1.016 | 1.399 |
| CPR | erysipelas | Simple mode | 4 | 0.209 | 0.116 | 0.169 | -0.018 | 0.435 | 1.232 | 0.982 | 1.545 |
| CPR | erysipelas | Weighted mode | 4 | 0.205 | 0.117 | 0.177 | -0.024 | 0.434 | 1.228 | 0.976 | 1.544 |
| SYK | erysipelas | MR Egger | 6 | -0.213 | 0.444 | 0.656 | -1.083 | 0.657 | 0.808 | 0.339 | 1.929 |
| SYK | erysipelas | Weighted median | 6 | -0.047 | 0.088 | 0.593 | -0.219 | 0.125 | 0.954 | 0.804 | 1.133 |
| SYK | erysipelas | Inverse variance weighted | 6 | -0.014 | 0.080 | 0.862 | -0.170 | 0.143 | 0.986 | 0.843 | 1.153 |
| SYK | erysipelas | Simple mode | 6 | -0.105 | 0.161 | 0.542 | -0.420 | 0.210 | 0.900 | 0.657 | 1.233 |
| SYK | erysipelas | Weighted mode | 6 | -0.152 | 0.164 | 0.395 | -0.473 | 0.169 | 0.859 | 0.623 | 1.184 |
| METAP1 | cellulitis | Wald ratio | 1 | 0.225 | 0.142 | 0.114 | -0.054 | 0.504 | 1.252 | 0.947 | 1.656 |
| CSK | cellulitis | Wald ratio | 1 | 0.200 | 0.141 | 0.154 | -0.075 | 0.476 | 1.222 | 0.928 | 1.610 |
| ULK3 | cellulitis | Wald ratio | 1 | 0.035 | 0.138 | 0.797 | -0.235 | 0.306 | 1.036 | 0.791 | 1.358 |
| ARHGAP25 | Cutaneous abscess, furuncle and carbuncle | MR Egger | 22 | 0.043 | 0.031 | 0.175 | -0.017 | 0.104 | 1.044 | 0.983 | 1.109 |
| ARHGAP25 | Cutaneous abscess, furuncle and carbuncle | Weighted median | 22 | 0.000 | 0.035 | 0.999 | -0.069 | 0.069 | 1.000 | 0.934 | 1.071 |
| ARHGAP25 | Cutaneous abscess, furuncle and carbuncle | Inverse variance weighted | 22 | 0.005 | 0.022 | 0.814 | -0.037 | 0.047 | 1.005 | 0.963 | 1.049 |
| ARHGAP25 | Cutaneous abscess, furuncle and carbuncle | Simple mode | 22 | 0.021 | 0.054 | 0.697 | -0.085 | 0.128 | 1.022 | 0.918 | 1.137 |
| ARHGAP25 | Cutaneous abscess, furuncle and carbuncle | Weighted mode | 22 | 0.006 | 0.037 | 0.873 | -0.066 | 0.077 | 1.006 | 0.936 | 1.081 |
| ENTPD6 | Cutaneous abscess, furuncle and carbuncle | MR Egger | 19 | 0.001 | 0.032 | 0.973 | -0.062 | 0.064 | 1.001 | 0.940 | 1.066 |
| ENTPD6 | Cutaneous abscess, furuncle and carbuncle | Weighted median | 19 | 0.017 | 0.032 | 0.594 | -0.046 | 0.080 | 1.017 | 0.955 | 1.083 |
| ENTPD6 | Cutaneous abscess, furuncle and carbuncle | Inverse variance weighted | 19 | 0.007 | 0.023 | 0.742 | -0.037 | 0.052 | 1.007 | 0.964 | 1.053 |
| ENTPD6 | Cutaneous abscess, furuncle and carbuncle | Simple mode | 19 | 0.004 | 0.043 | 0.934 | -0.082 | 0.089 | 1.004 | 0.922 | 1.093 |
| ENTPD6 | Cutaneous abscess, furuncle and carbuncle | Weighted mode | 19 | 0.017 | 0.036 | 0.640 | -0.053 | 0.087 | 1.017 | 0.949 | 1.091 |
| IGF2R | Cutaneous abscess, furuncle and carbuncle | MR Egger | 22 | 0.016 | 0.033 | 0.633 | -0.049 | 0.081 | 1.016 | 0.952 | 1.084 |
| IGF2R | Cutaneous abscess, furuncle and carbuncle | Weighted median | 22 | 0.012 | 0.036 | 0.740 | -0.059 | 0.083 | 1.012 | 0.943 | 1.086 |
| IGF2R | Cutaneous abscess, furuncle and carbuncle | Inverse variance weighted | 22 | 0.011 | 0.023 | 0.634 | -0.034 | 0.055 | 1.011 | 0.967 | 1.057 |
| IGF2R | Cutaneous abscess, furuncle and carbuncle | Simple mode | 22 | 0.042 | 0.054 | 0.440 | -0.063 | 0.148 | 1.043 | 0.939 | 1.160 |
| IGF2R | Cutaneous abscess, furuncle and carbuncle | Weighted mode | 22 | 0.020 | 0.036 | 0.574 | -0.050 | 0.091 | 1.021 | 0.951 | 1.095 |

**Supplementary Table 6:** MR Steiger tests results

| **exposure** | **outcome** | **snp_r2.exposure** | **snp_r2.outcome** | **correct_causal_direction** | **steiger_pval** |
| --- | --- | --- | --- | --- | --- |
| FN1 | erysipelas | 0.034 | 9.53E-05 | TRUE | 5.85E-223 |
| SYK | erysipelas | 0.006 | 2.73E-05 | TRUE | 8.76E-42 |
| CRP | erysipelas | 0.011 | 4.05E-05 | TRUE | 1.67E-73 |
| CSK | cellulitis | 0.002 | 3.44E-05 | TRUE | 7.58E-10 |
| METAP1 | cellulitis | 0.002 | 2.66E-05 | TRUE | 3.22E-11 |
| ULK3 | cellulitis | 0.003 | 2.89E-05 | TRUE | 8.78E-17 |
| ARHGAP25 | Cutaneous abscess, furuncle and carbuncle | 0.010 | 3.46E-05 | TRUE | 9.53E-63 |
| ENTPD6 | Cutaneous abscess, furuncle and carbuncle | 0.006 | 2.74E-05 | TRUE | 1.08E-38 |
| IGF2R | Cutaneous abscess, furuncle and carbuncle | 0.041 | 2.81E-05 | TRUE | 1.24E-291 |

**Supplementary Table 7:** The colocalization results

| **Protein** | **Outcome** | **Colocalization (±500kb)** | | **Robust colocalization evidence** |
| --- | --- | --- | --- | --- |
| **nsnp** | **PP4** |
| FN1 | erysipelas | 847 | 0.8398 | YES |
| SYK | 818 | 0.0062 | NO |
| CSK | cellulitis | 636 | 0.9131 | YES |
| ULK3 | 652 | 0.8789 | YES |
| ARHGAP25 | Cutaneous abscess, furuncle and carbuncle | 1025 | 0.9422 | YES |
| ENTPD6 | 929 | 0.9103 | YES |
| IGF2R | 782 | 0.2959 | NO |

**Supplementary Table 8:** external validation results

| **Gene** | **probeID** | **topSNP** | **b_SMR** | **se_SMR** | **p_SMR** | **p_HEIDI** | **nsnp_HEIDI** | **FDR** |
| --- | --- | --- | --- | --- | --- | --- | --- | --- |
| FN1 | ENSG00000115414 | rs1250259 | -0.268 | 0.071 | 1.54E-04 | 0.350 | 20 | 1.54E-04 |
| SYK | ENSG00000165025 | rs772407 | -0.317 | 0.146 | 2.95E-02 | 0.087 | 10 | 2.95E-02 |
| CSK | ENSG00000103653 | rs4886619 | -0.936 | 0.264 | 3.97E-04 | 0.659 | 18 | 3.97E-04 |
| METAP1 | ENSG00000164024 | rs7676259 | -0.811 | 0.252 | 1.26E-03 | 0.686 | 11 | 1.26E-03 |
| ULK3 | ENSG00000140474 | rs936228 | -0.674 | 0.195 | 5.69E-04 | 0.655 | 20 | 5.69E-04 |
| IGF2R | ENSG00000197081 | rs629849 | 0.073 | 0.066 | 2.67E-01 | 0.984 | 11 | 2.67E-01 |
| ENTPD6 | ENSG00000197586 | rs6050446 | 0.499 | 0.142 | 4.22E-04 | 0.601 | 20 | 4.22E-04 |
| ARHGAP25 | ENSG00000163219 | rs13413887 | -0.359 | 0.090 | 6.66E-05 | 0.387 | 20 | 6.66E-05 |

**Supplementary Table 9:** List of druggability analysis

| **Diseases** | **Target** | **Description** | **BgRatio** | **RichFactor** | **FoldEnrichment** | **zScore** | **pvalue** | **p.adjust** | **geneID** | **Count** |
| --- | --- | --- | --- | --- | --- | --- | --- | --- | --- | --- |
| erysipelas | FN1 | Sitaxentan | 10/19533 | 1.00E-01 | 1953.3 | 44.185 | 5.12E-04 | 1.16E-02 | FN1 | 1 |
| ALUMINUM ION | 15/19533 | 6.67E-02 | 1302.2 | 36.072 | 7.68E-04 | 1.16E-02 | FN1 | 1 |
| Brucinum | 15/19533 | 6.67E-02 | 1302.2 | 36.072 | 7.68E-04 | 1.16E-02 | FN1 | 1 |
| MELAMINE | 15/19533 | 6.67E-02 | 1302.2 | 36.072 | 7.68E-04 | 1.16E-02 | FN1 | 1 |
| calphostin C | 17/19533 | 5.88E-02 | 1149 | 33.882 | 8.70E-04 | 1.16E-02 | FN1 | 1 |
| Temposil | 17/19533 | 5.88E-02 | 1149 | 33.882 | 8.70E-04 | 1.16E-02 | FN1 | 1 |
| formoterol | 21/19533 | 4.76E-02 | 930.143 | 30.482 | 1.08E-03 | 1.16E-02 | FN1 | 1 |
| mercaptopurine | 22/19533 | 4.55E-02 | 887.864 | 29.780 | 1.13E-03 | 1.16E-02 | FN1 | 1 |
| 60282-87-3 | 23/19533 | 4.35E-02 | 849.261 | 29.125 | 1.18E-03 | 1.16E-02 | FN1 | 1 |
| Chlorhexidine diacetate | 23/19533 | 4.35E-02 | 849.261 | 29.125 | 1.18E-03 | 1.16E-02 | FN1 | 1 |
| cellulitis | CSK/ULK3 | ZM-447439 | 44/19533 | 4.55E-02 | 443.932 | 29.764 | 4.96E-06 | 3.77E-04 | CSK/ULK3 | 2 |
| hesperadin | 80/19533 | 2.50E-02 | 244.163 | 22.053 | 1.66E-05 | 4.69E-04 | CSK/ULK3 | 2 |
| Axitinib | 116/19533 | 1.72E-02 | 168.388 | 18.297 | 3.50E-05 | 4.69E-04 | CSK/ULK3 | 2 |
| SKI-606 | 117/19533 | 1.71E-02 | 166.949 | 18.219 | 3.56E-05 | 4.69E-04 | CSK/ULK3 | 2 |
| Dabrafenib | 133/19533 | 1.50E-02 | 146.865 | 17.081 | 4.60E-05 | 4.69E-04 | CSK/ULK3 | 2 |
| BMS-536924,KIN001-126 | 142/19533 | 1.41E-02 | 137.556 | 16.527 | 5.25E-05 | 4.69E-04 | CSK/ULK3 | 2 |
| HG-6-64-01 | 145/19533 | 1.38E-02 | 134.710 | 16.353 | 5.47E-05 | 4.69E-04 | CSK/ULK3 | 2 |
| EXEL-2880/GSK-1363089 | 149/19533 | 1.34E-02 | 131.094 | 16.131 | 5.78E-05 | 4.69E-04 | CSK/ULK3 | 2 |
| Vandetanib | 150/19533 | 1.33E-02 | 130.22 | 16.076 | 5.86E-05 | 4.69E-04 | CSK/ULK3 | 2 |
| HG-9-91-01 | 154/19533 | 1.30E-02 | 126.838 | 15.865 | 6.18E-05 | 4.69E-04 | CSK/ULK3 | 2 |
| Cutaneous abscess, furuncle and carbuncle | ENTPD6 | ciclopirox | 420/19533 | 2.38E-03 | 23.254 | 4.665 | 4.25E-02 | 4.25E-02 | ARHGAP25 | 1 |
| ARHGAP25 | N.A. | N.A. | N.A. | N.A. | N.A. | N.A. | N.A. | N.A. | N.A. |
